# Supplementary material
Source: PubMed Central journal article supplement (PMC4639984)
Supplement: JCI80652sd.pdf [file JCI80652sd.pdf]

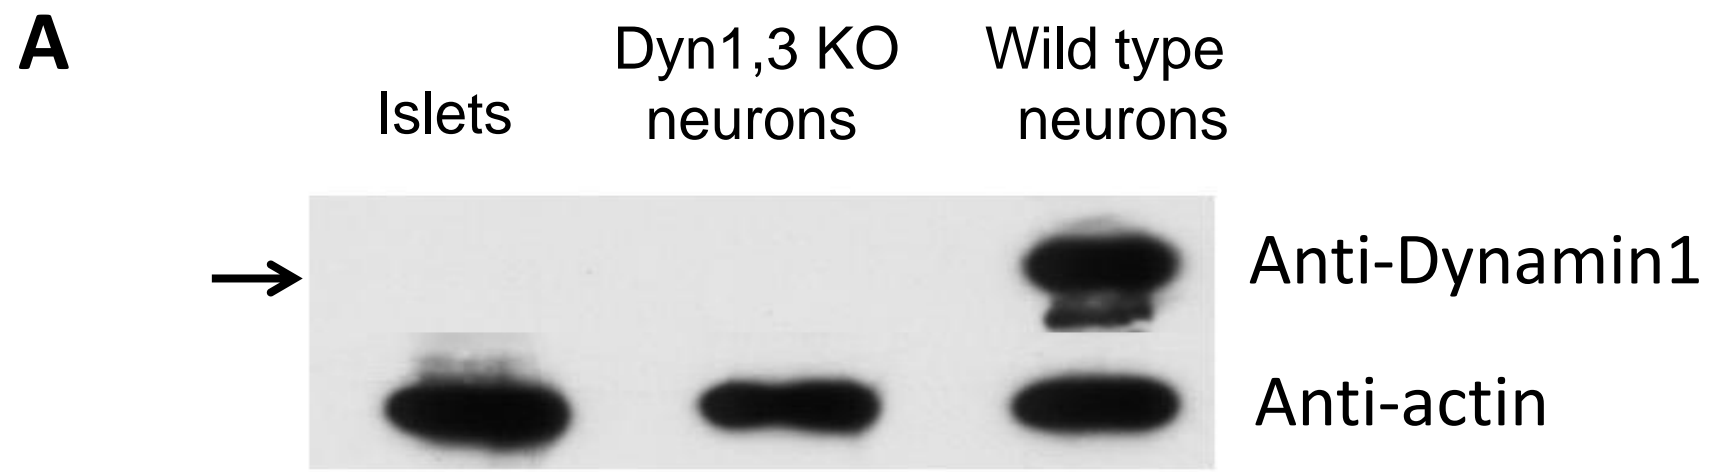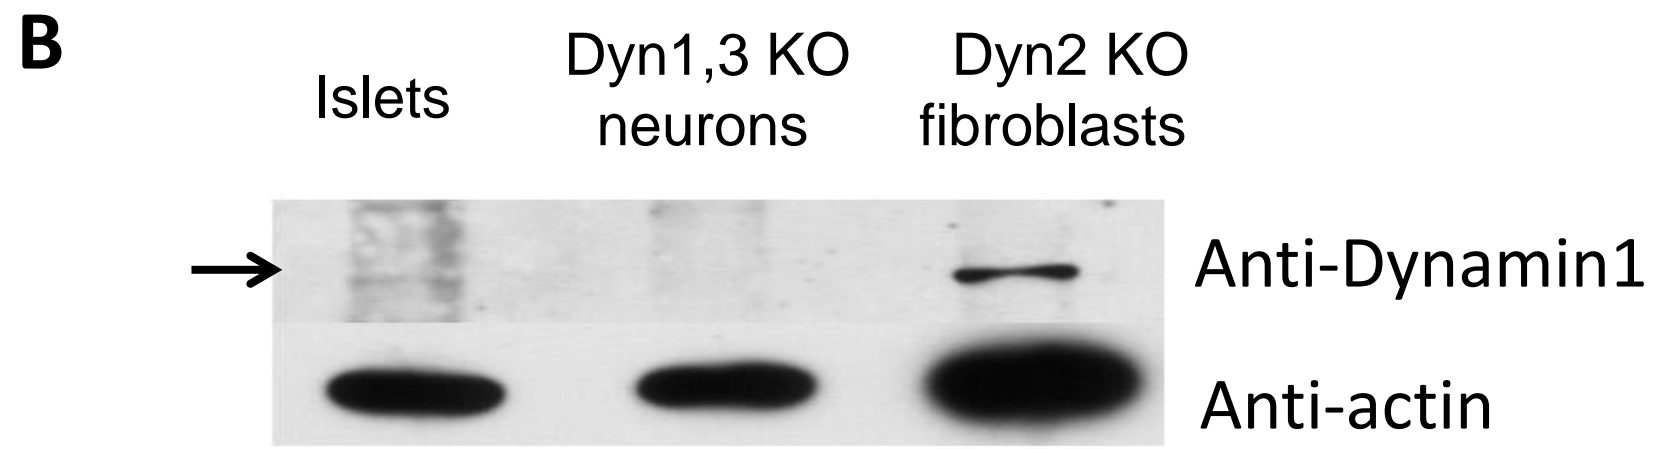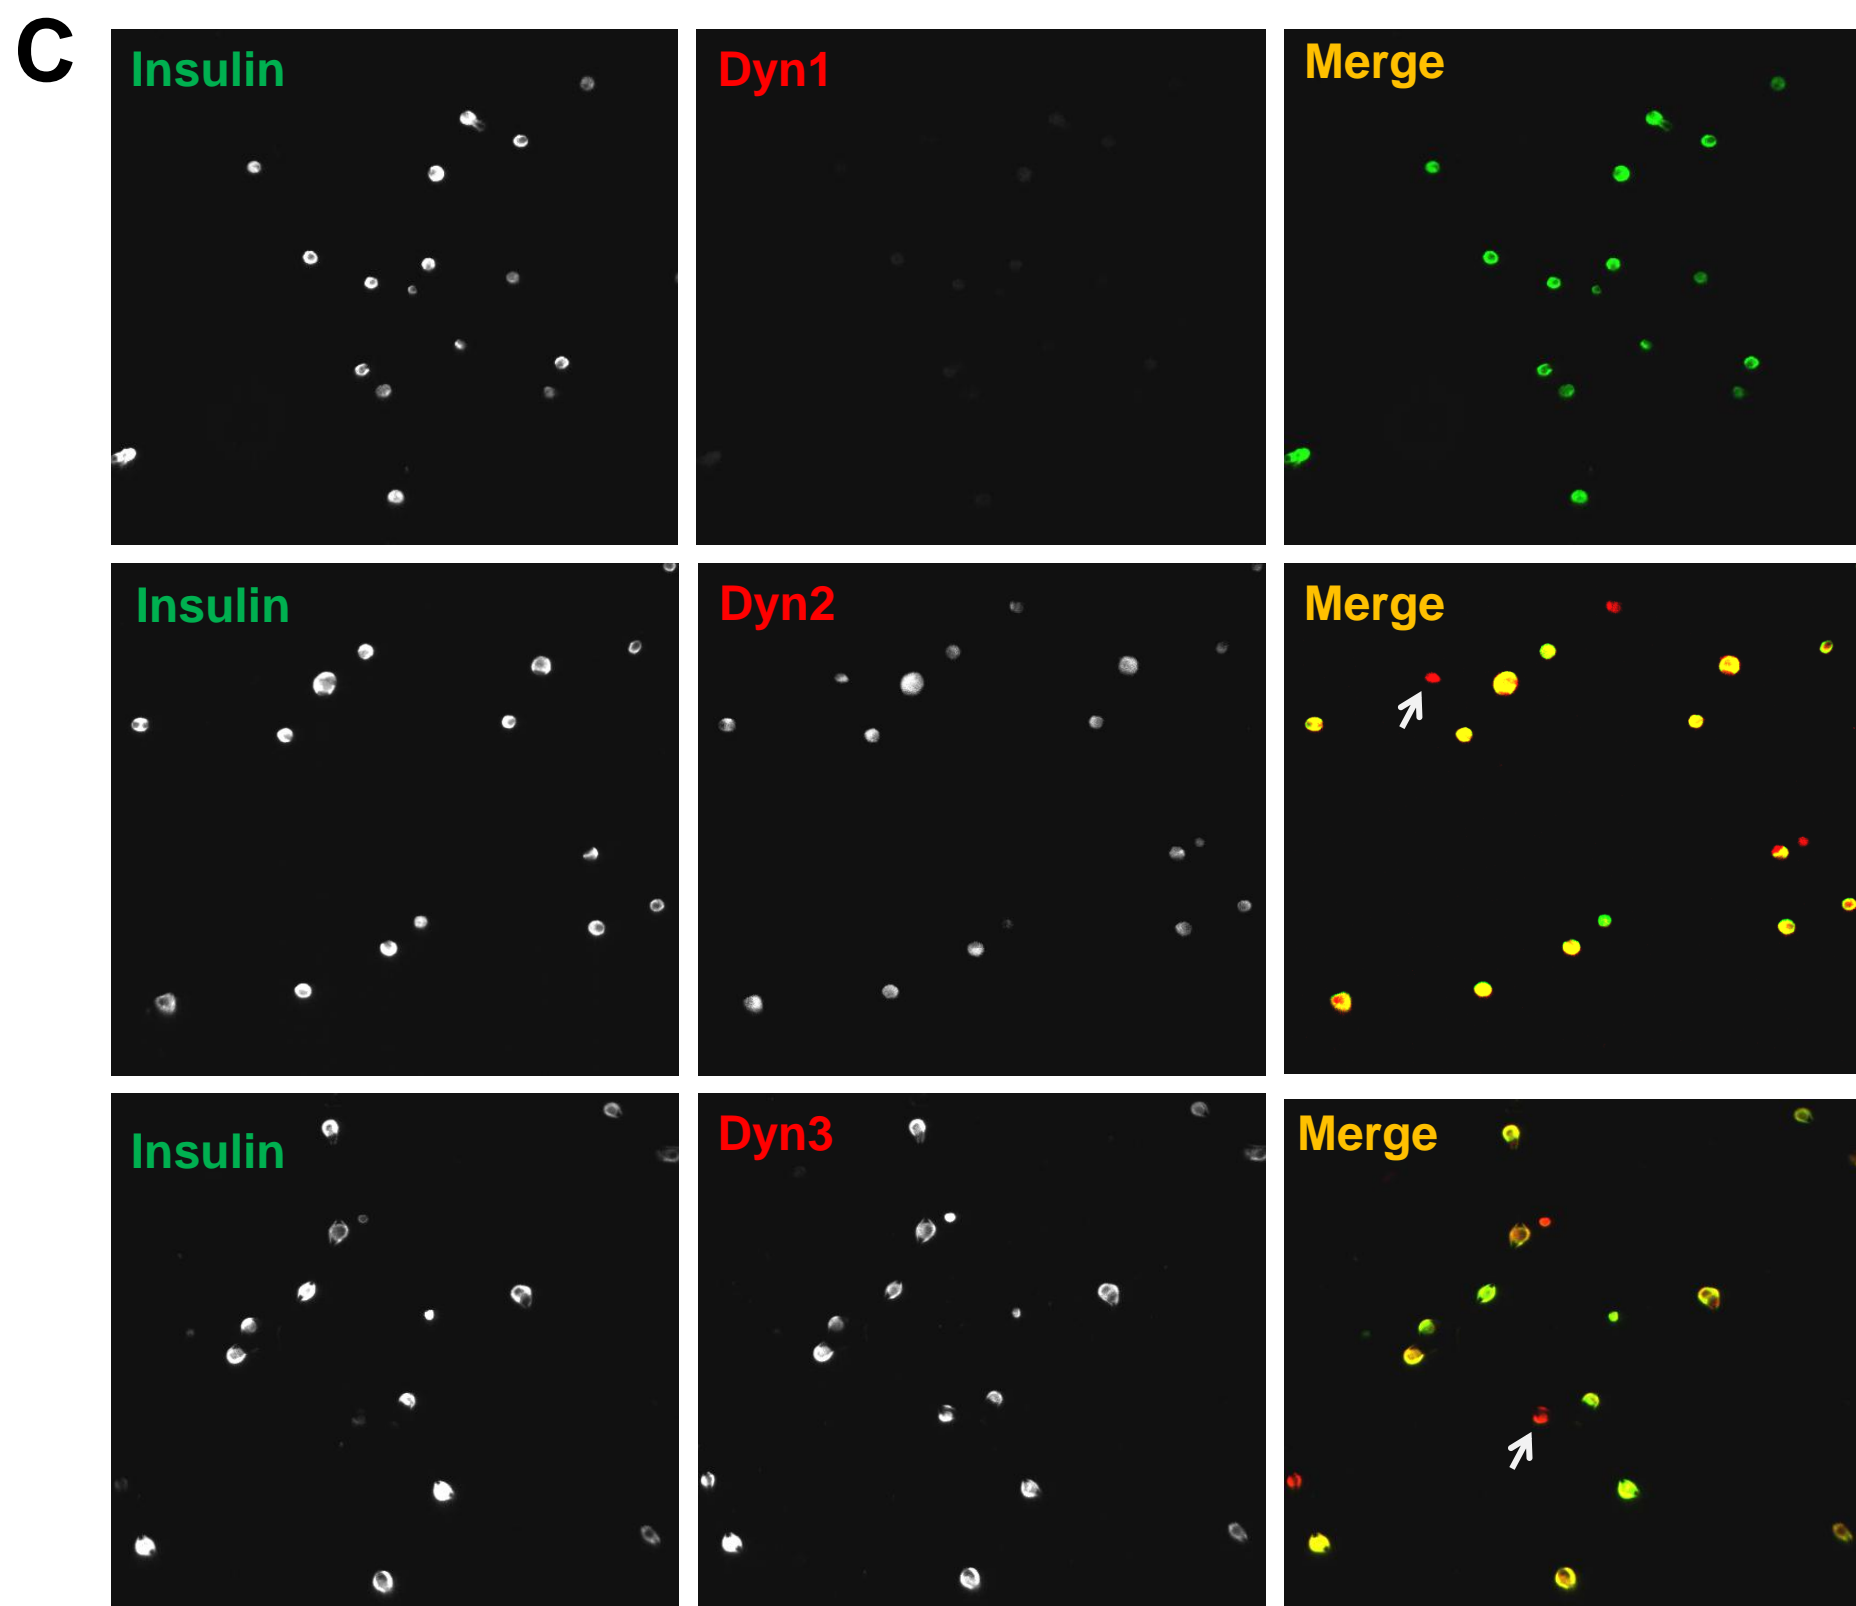

Supplementary Figure 1

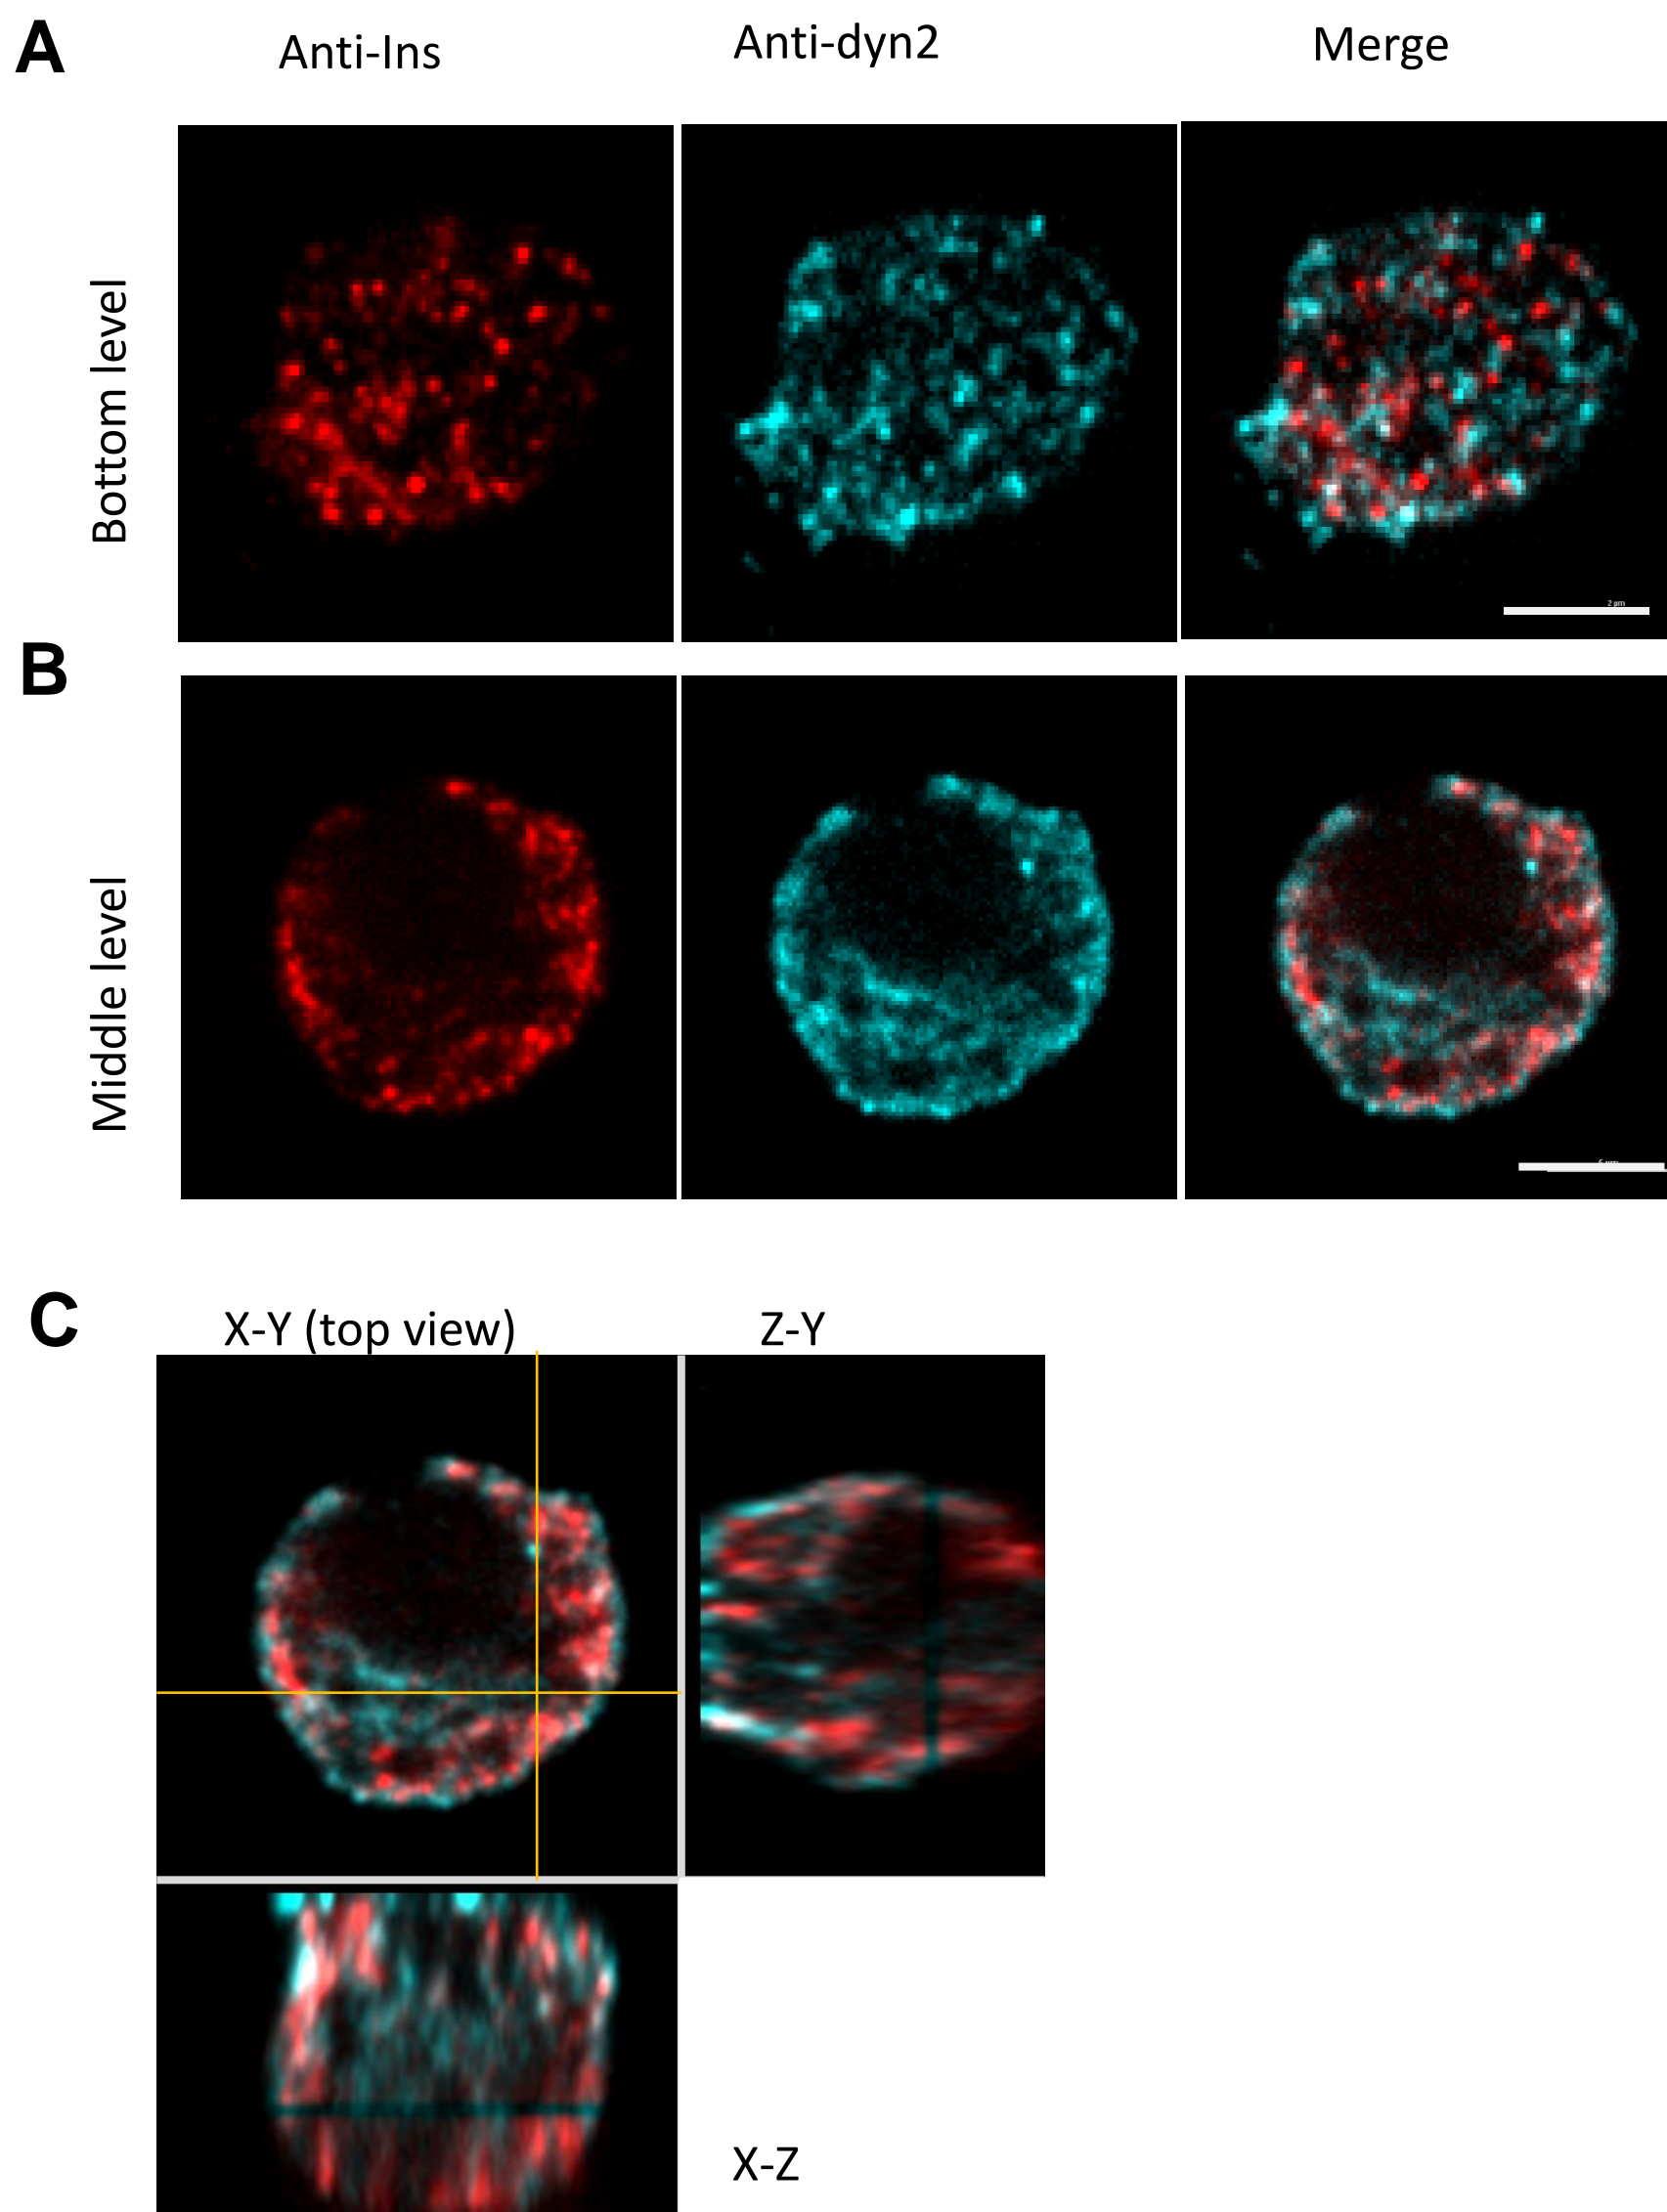

Supplementary Figure 2

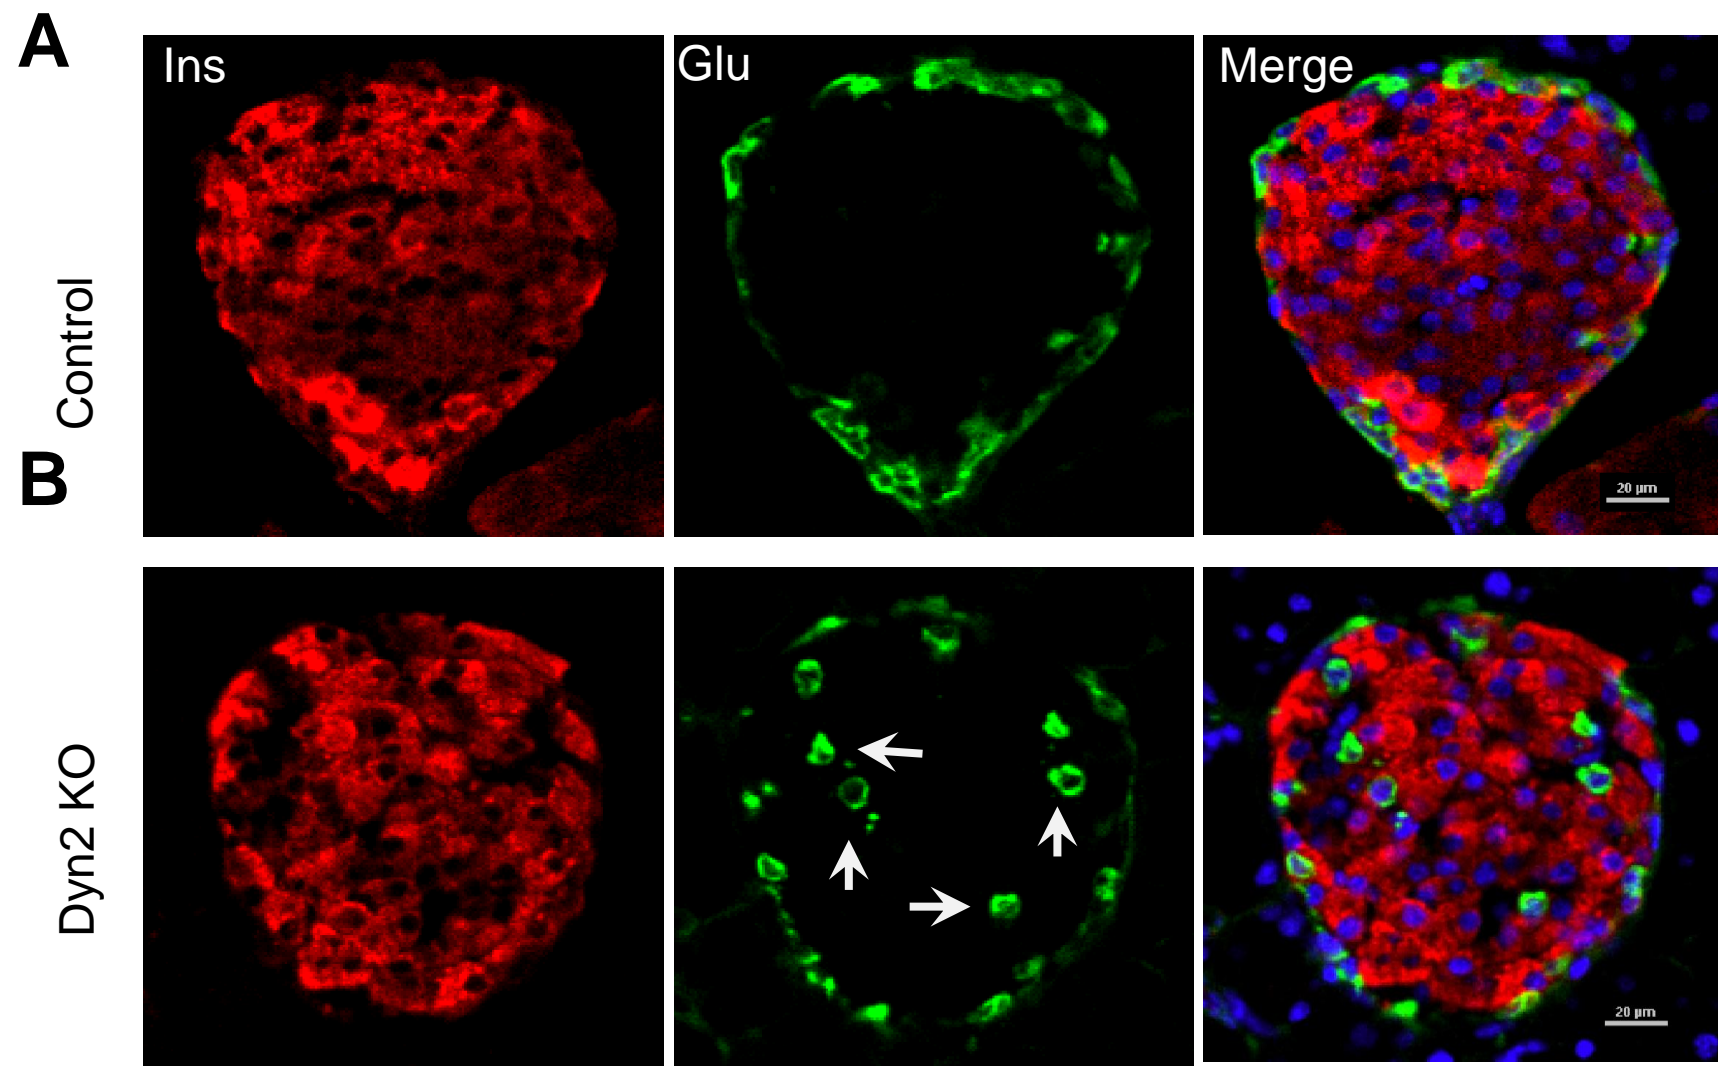

Supplementary Figure 3.

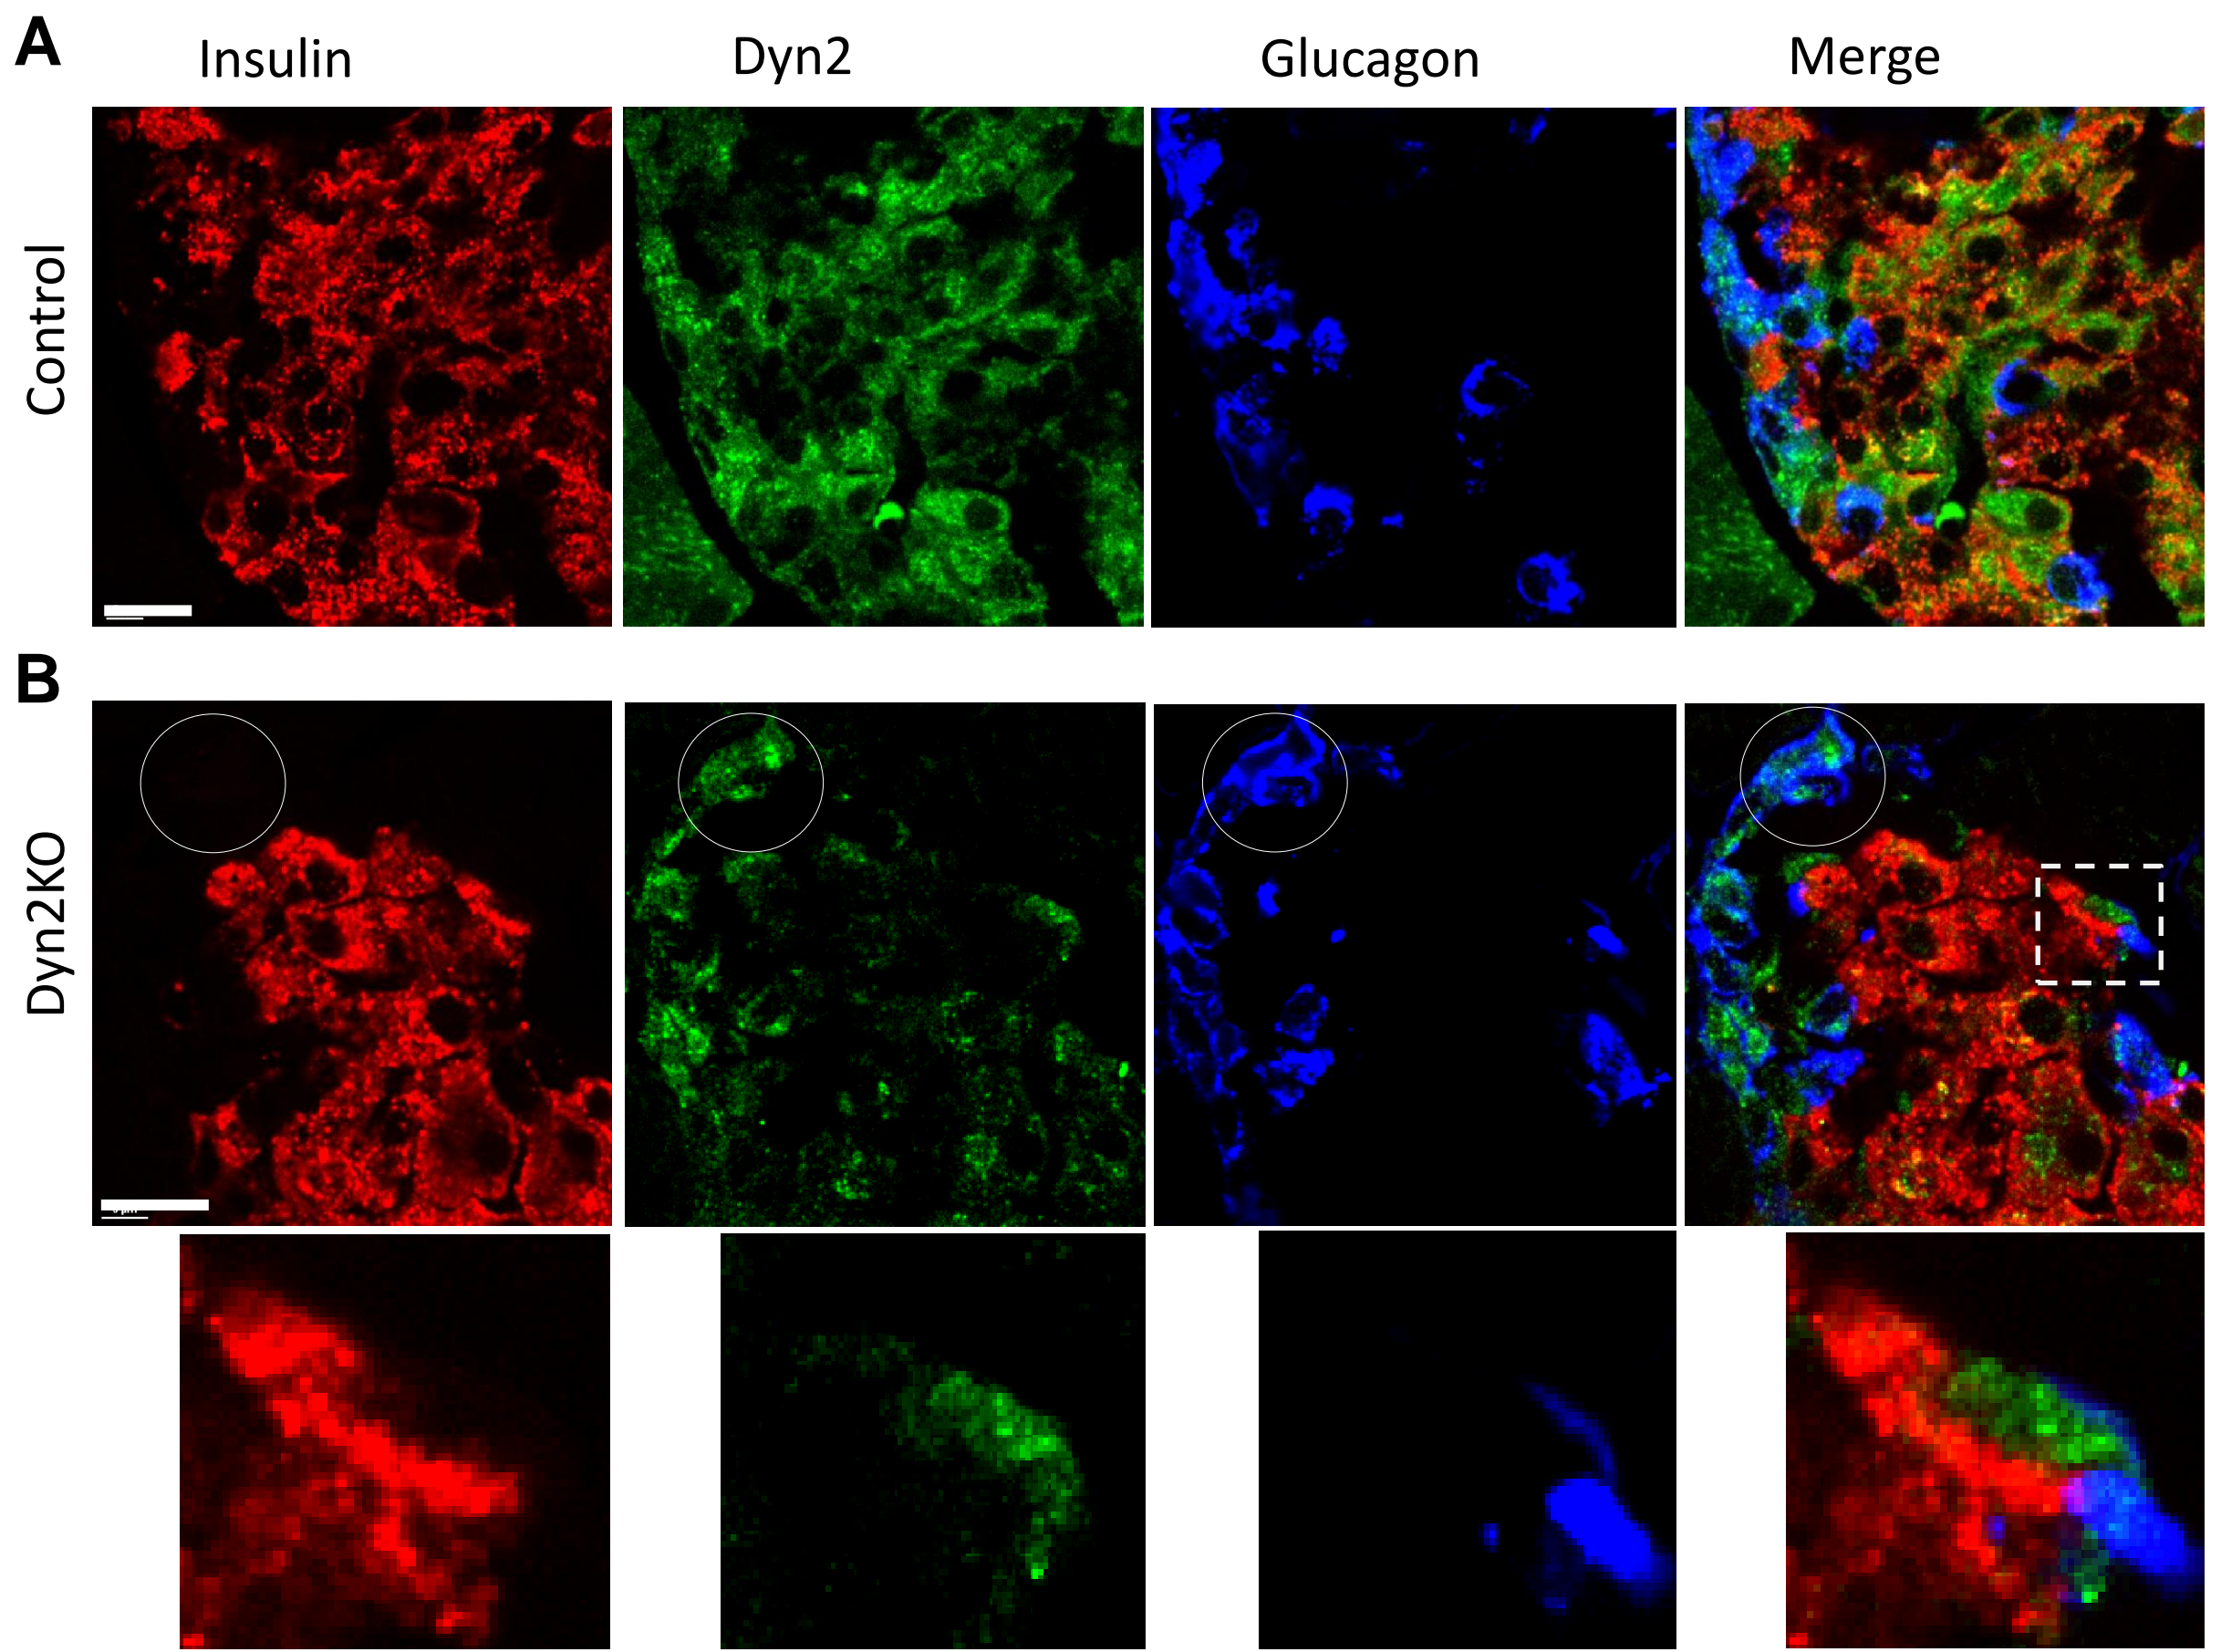

Supplementary Figure 4

**A** Control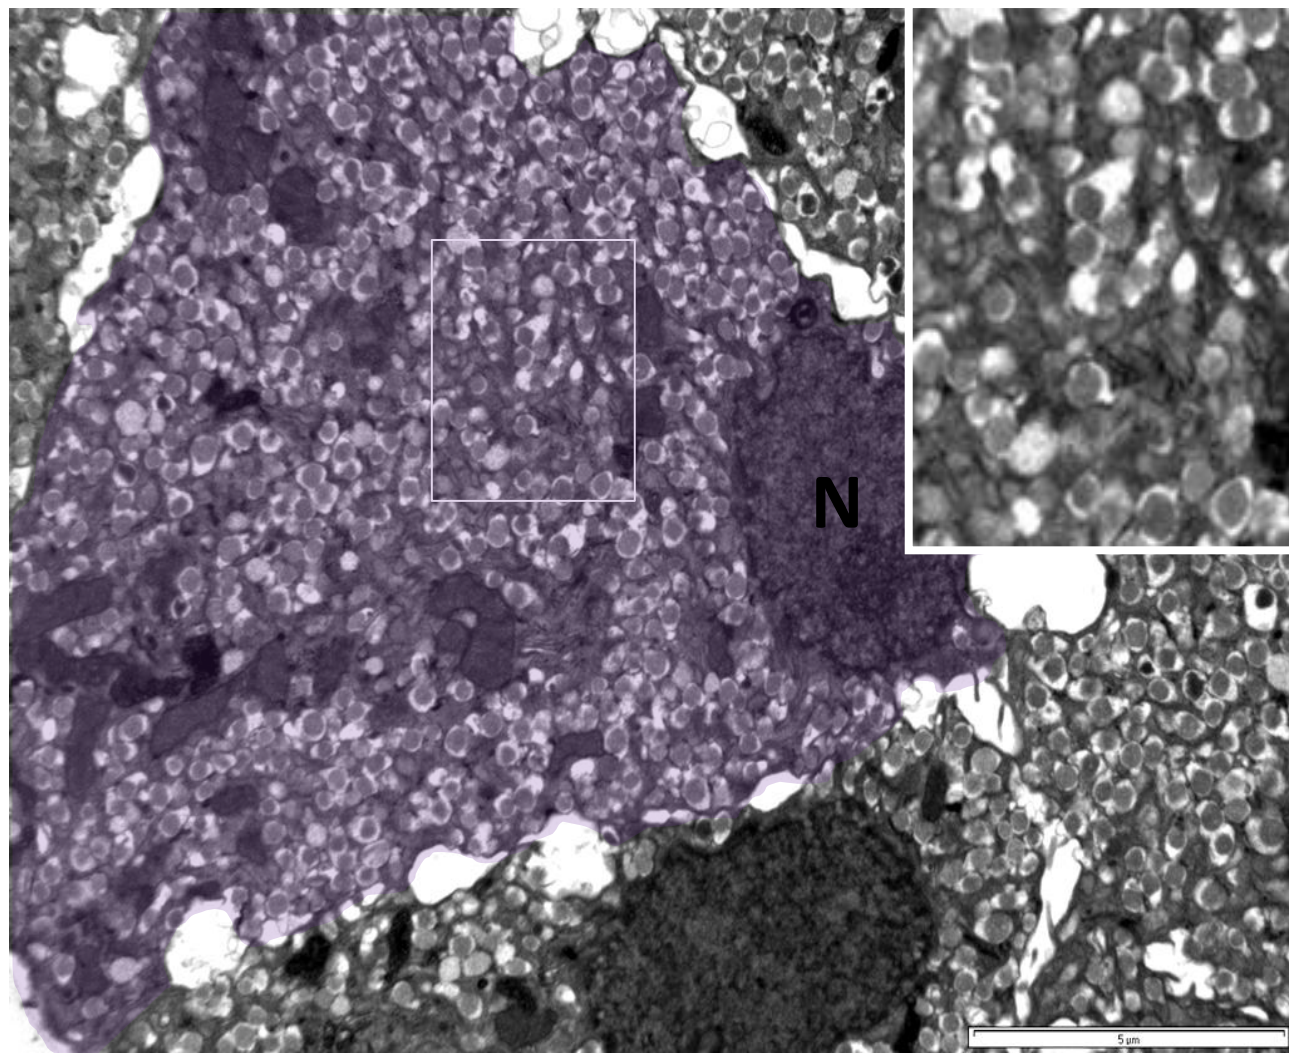**B** Dyn2 KO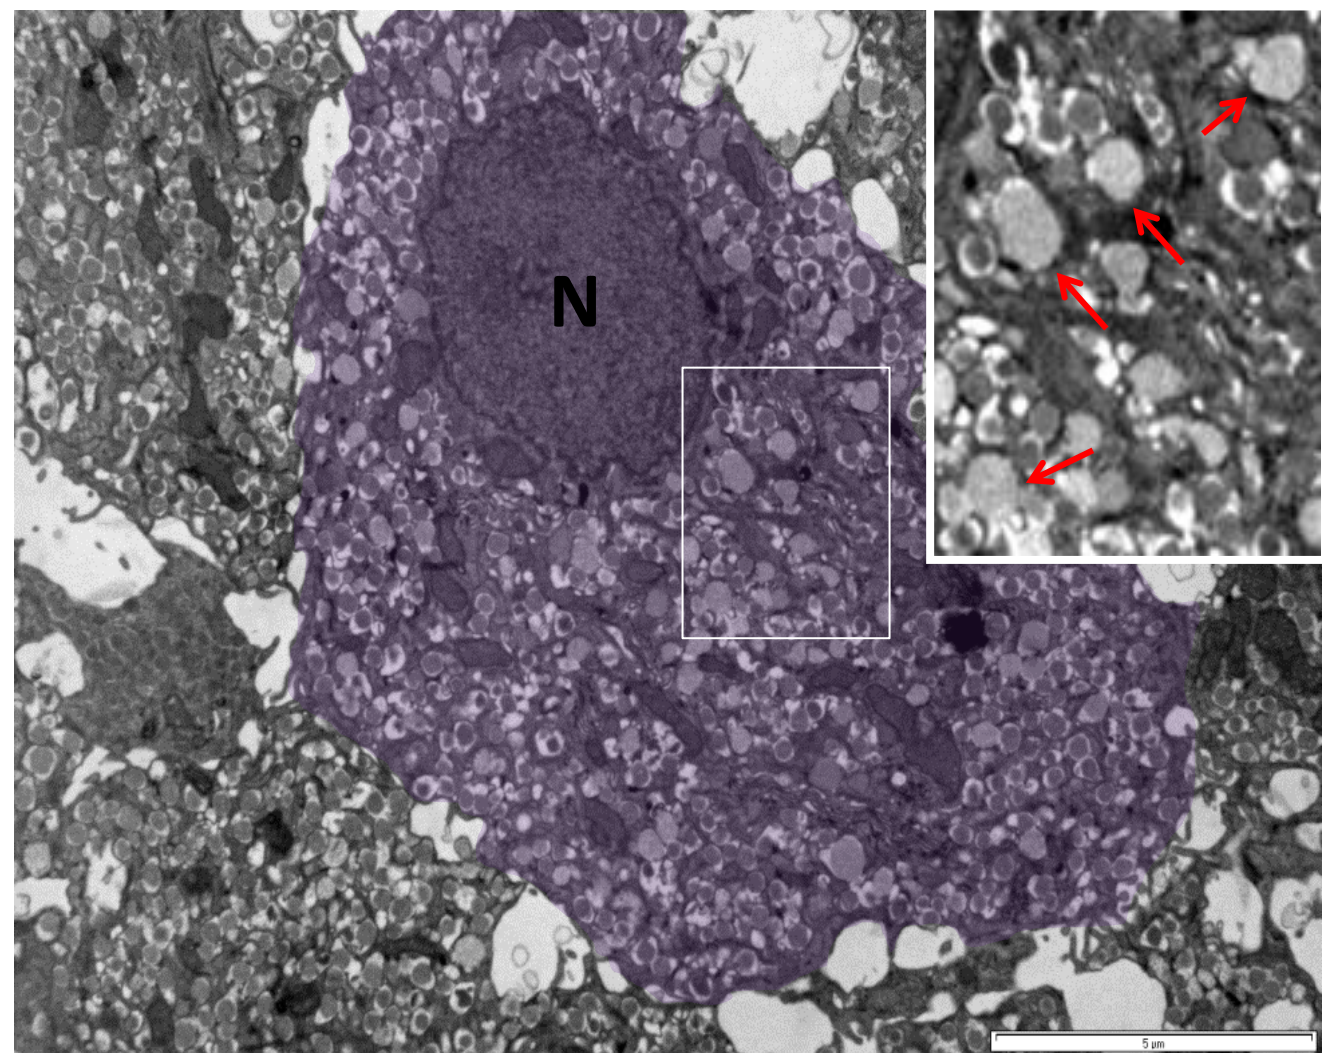**C**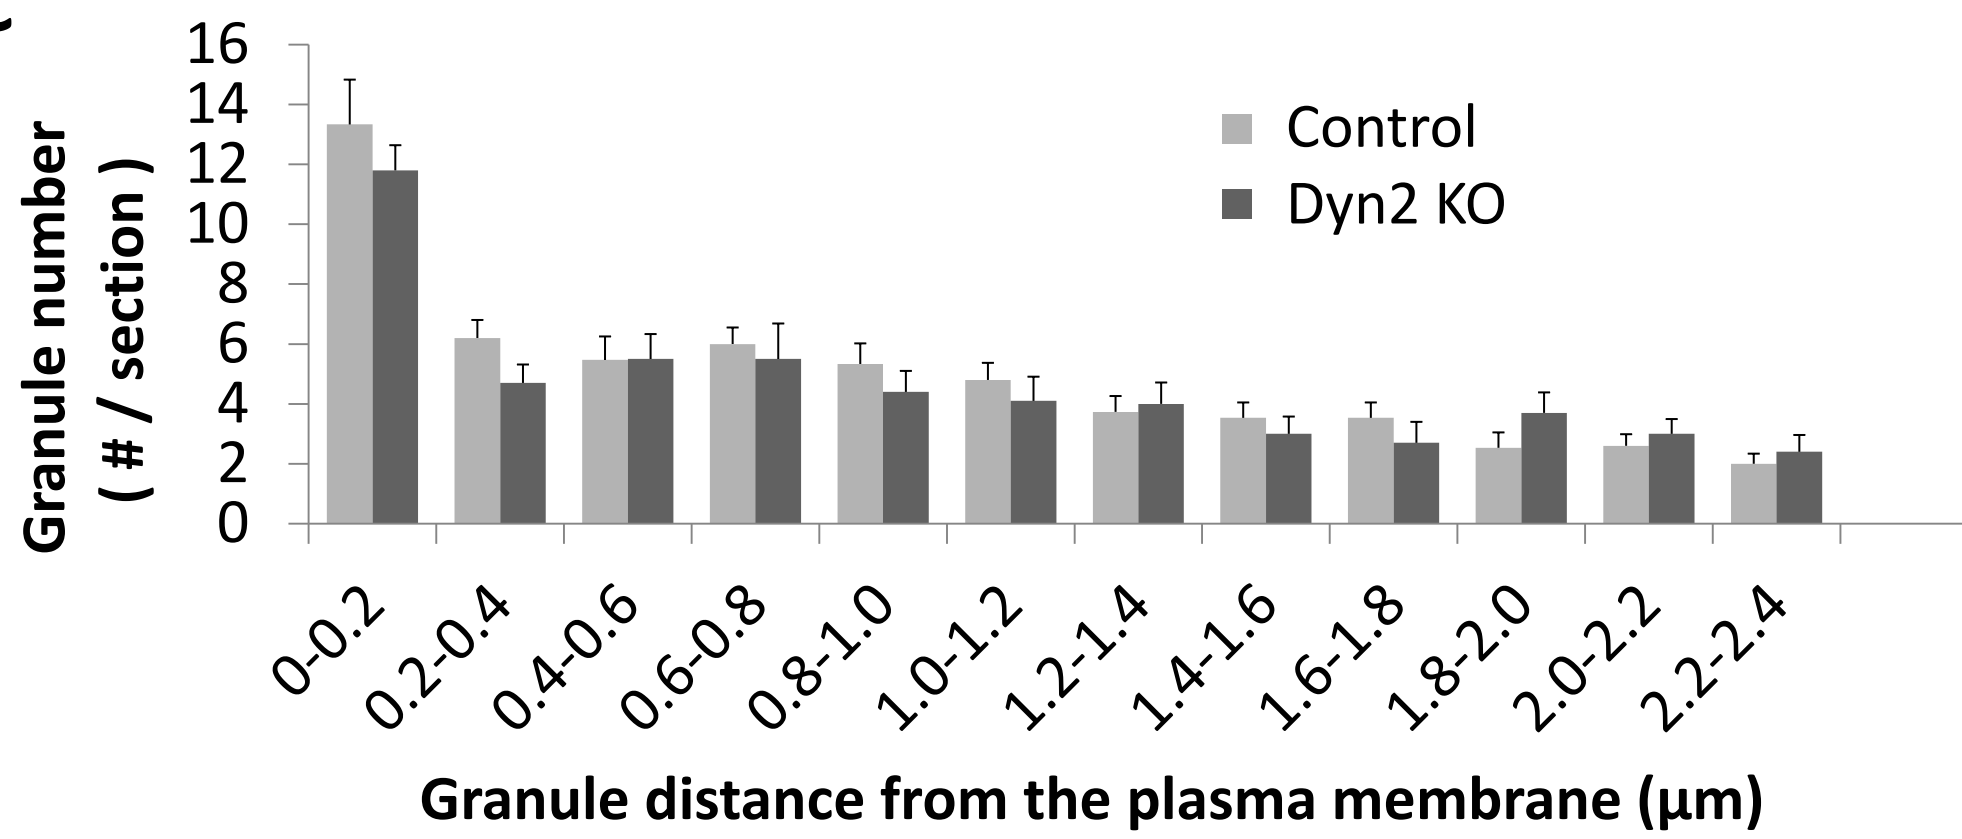**D** Dyn2 KO 20 mM Glucose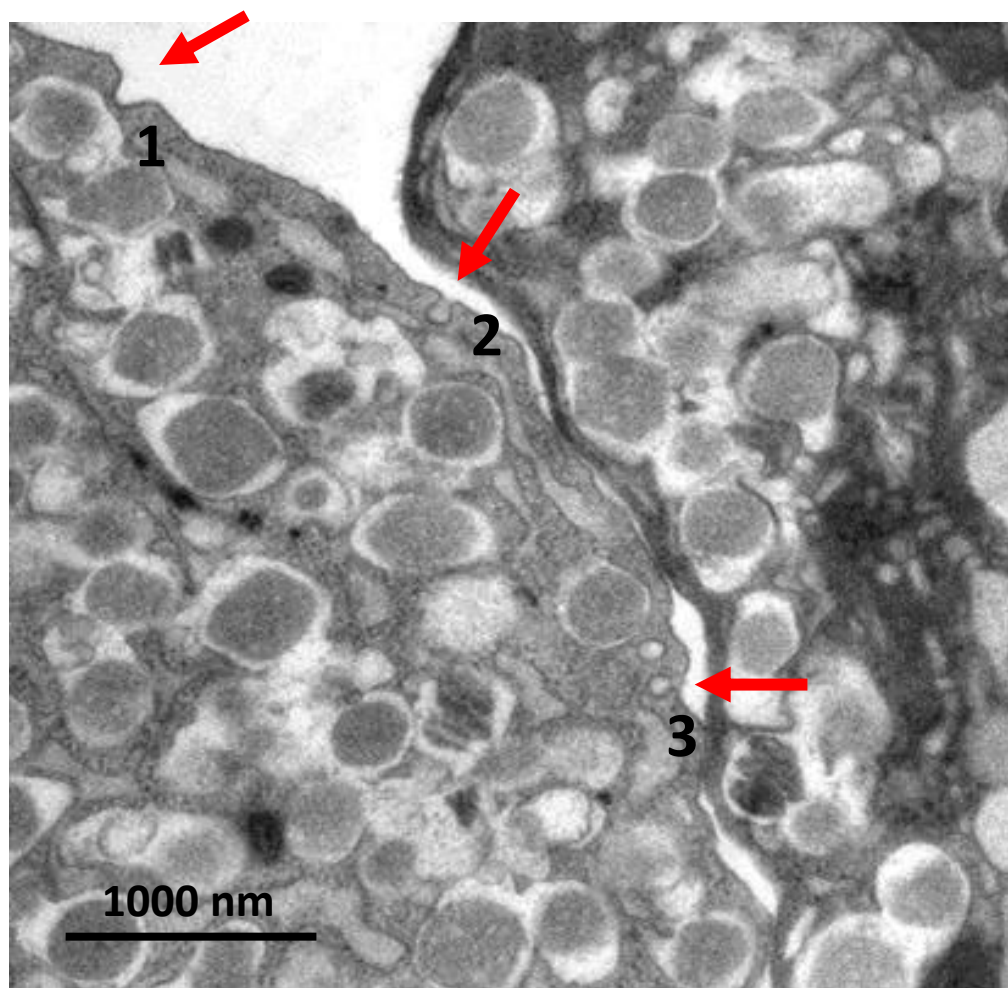**E**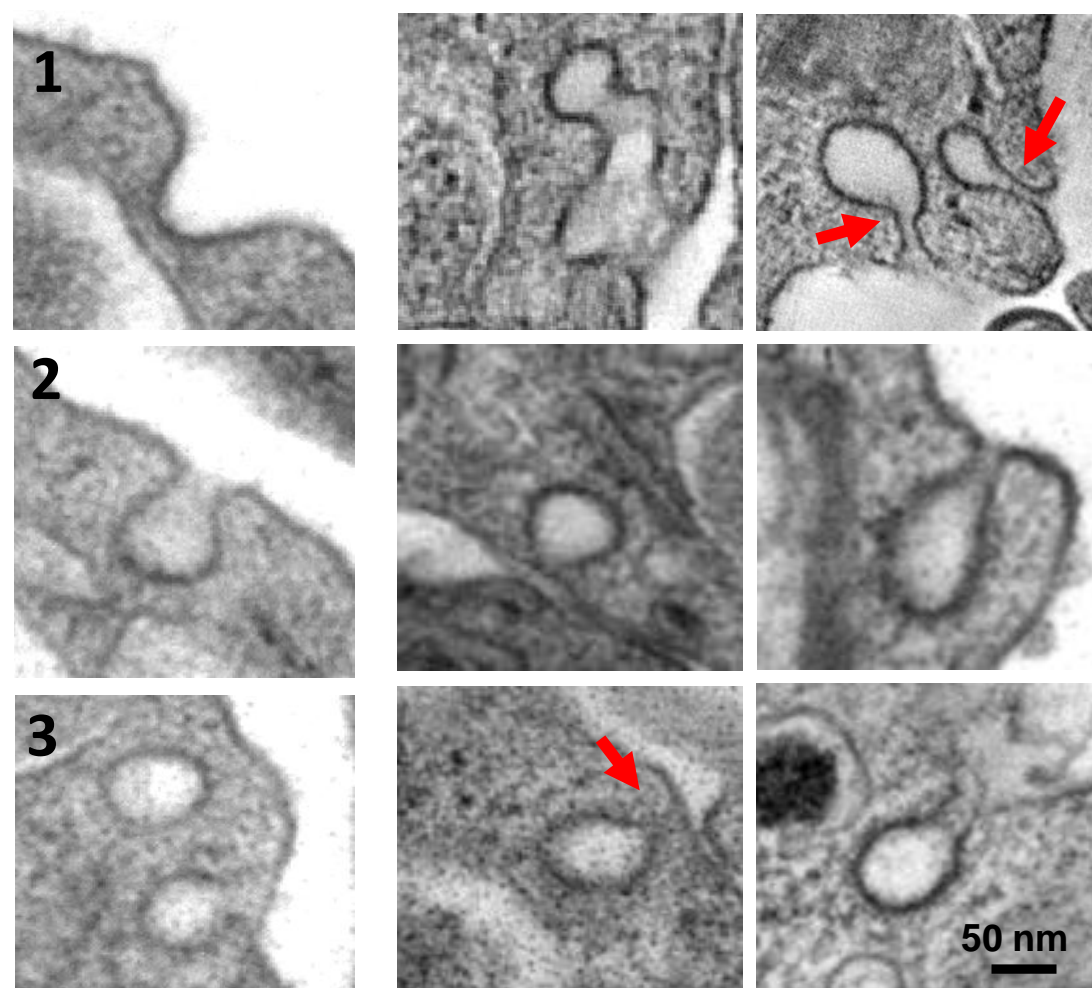

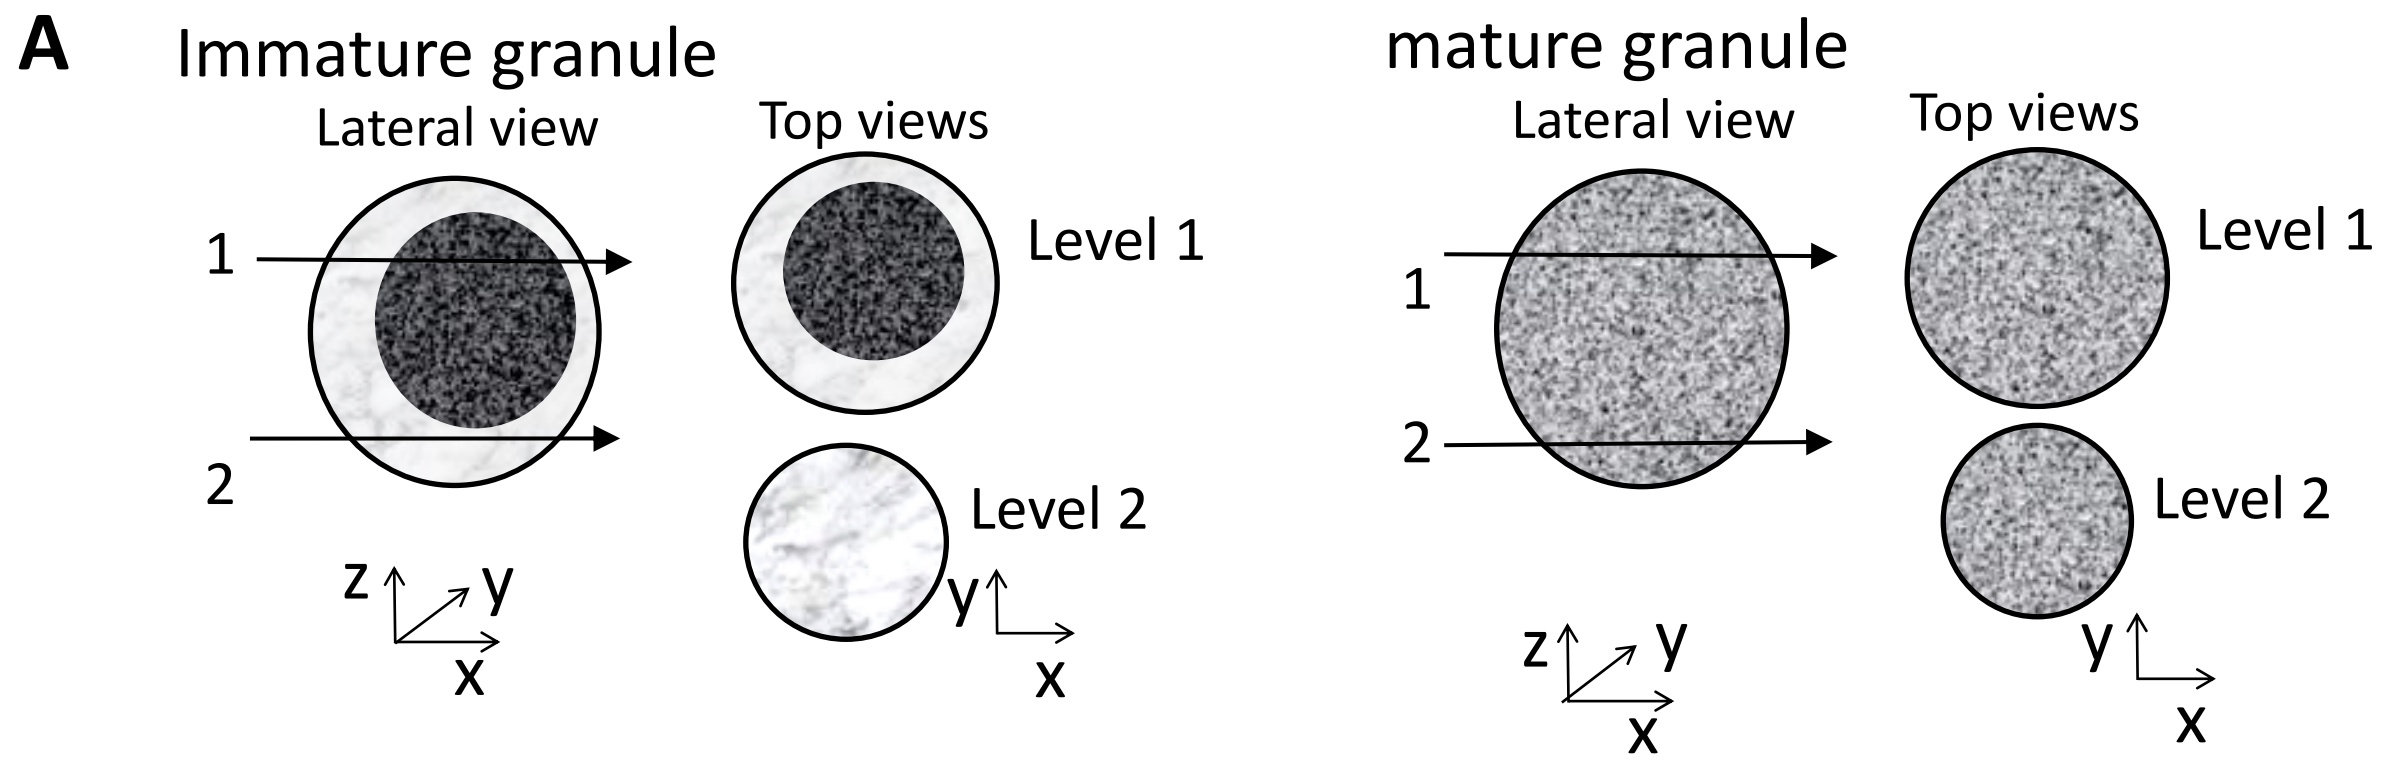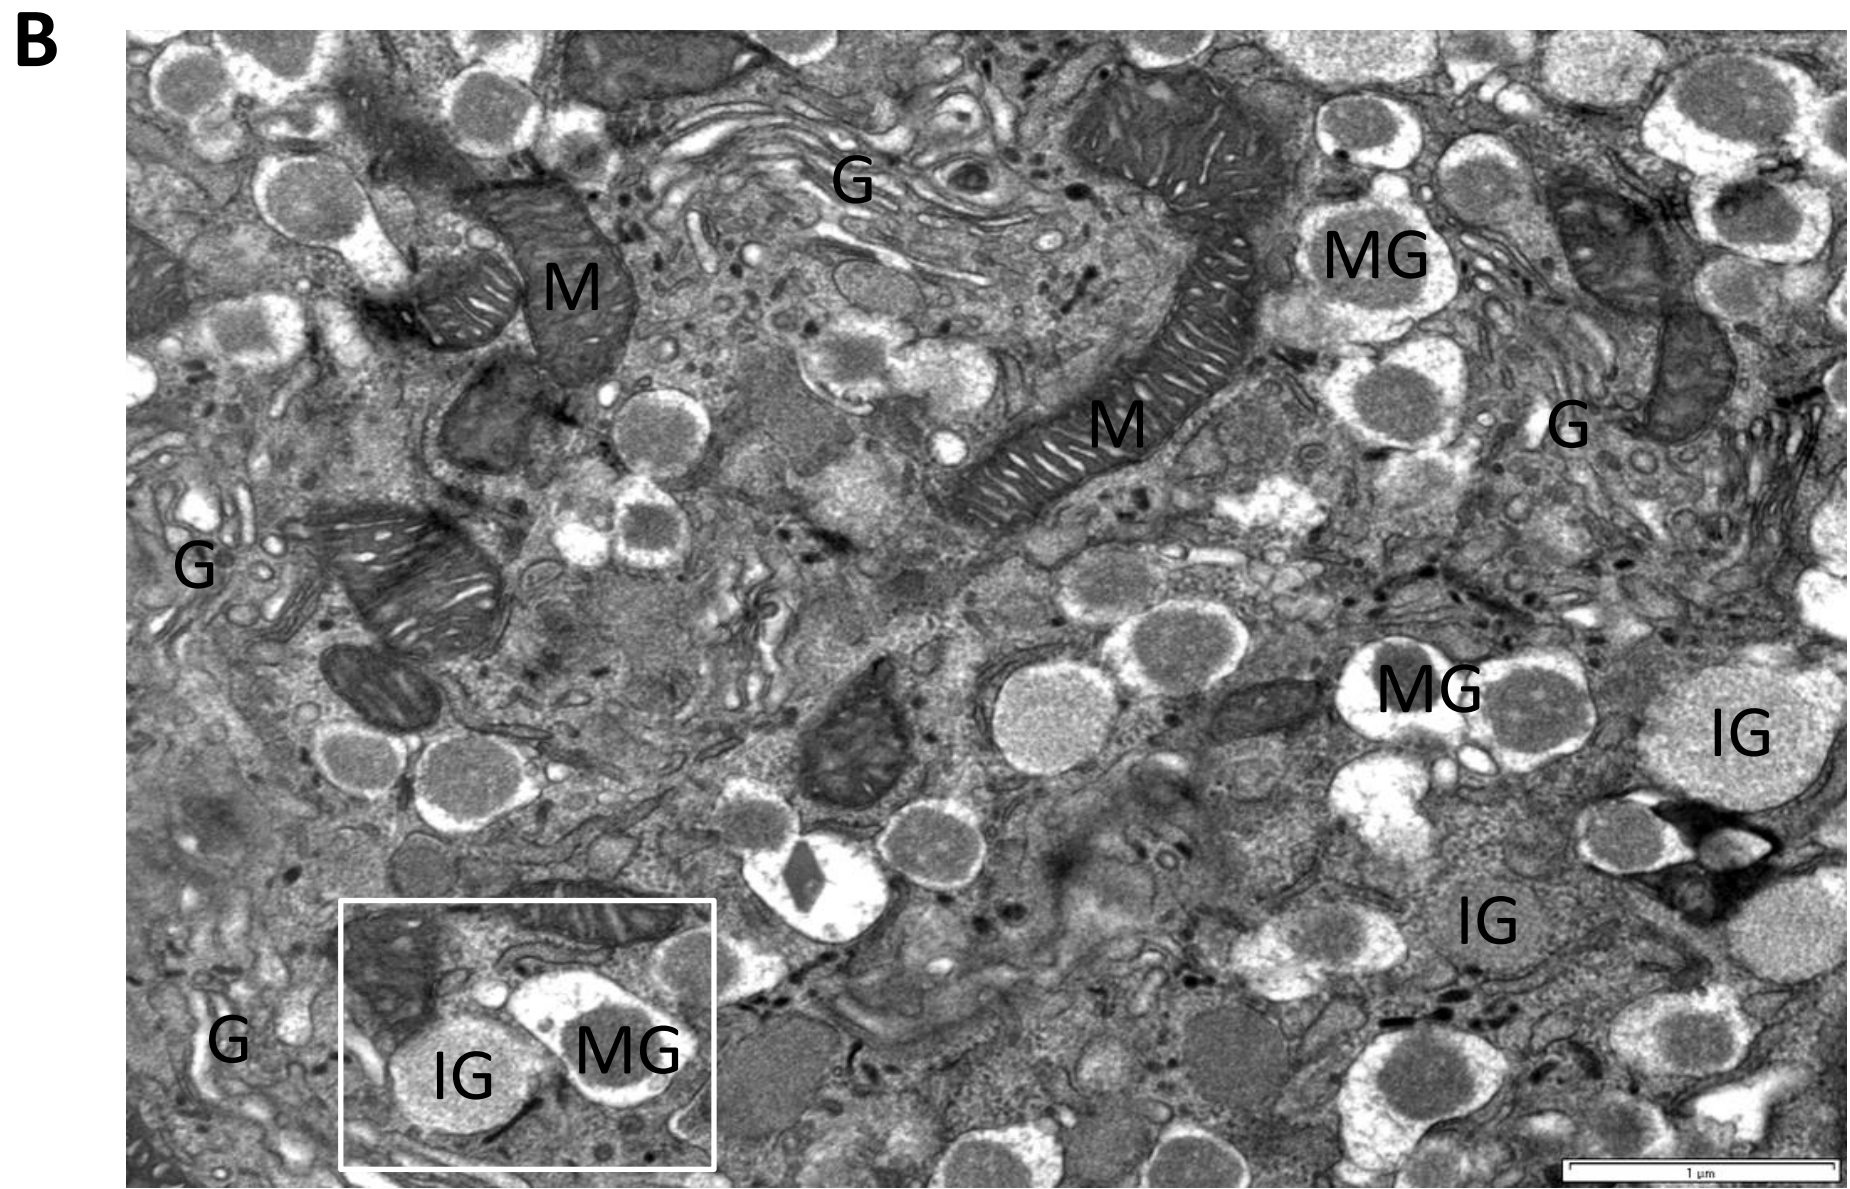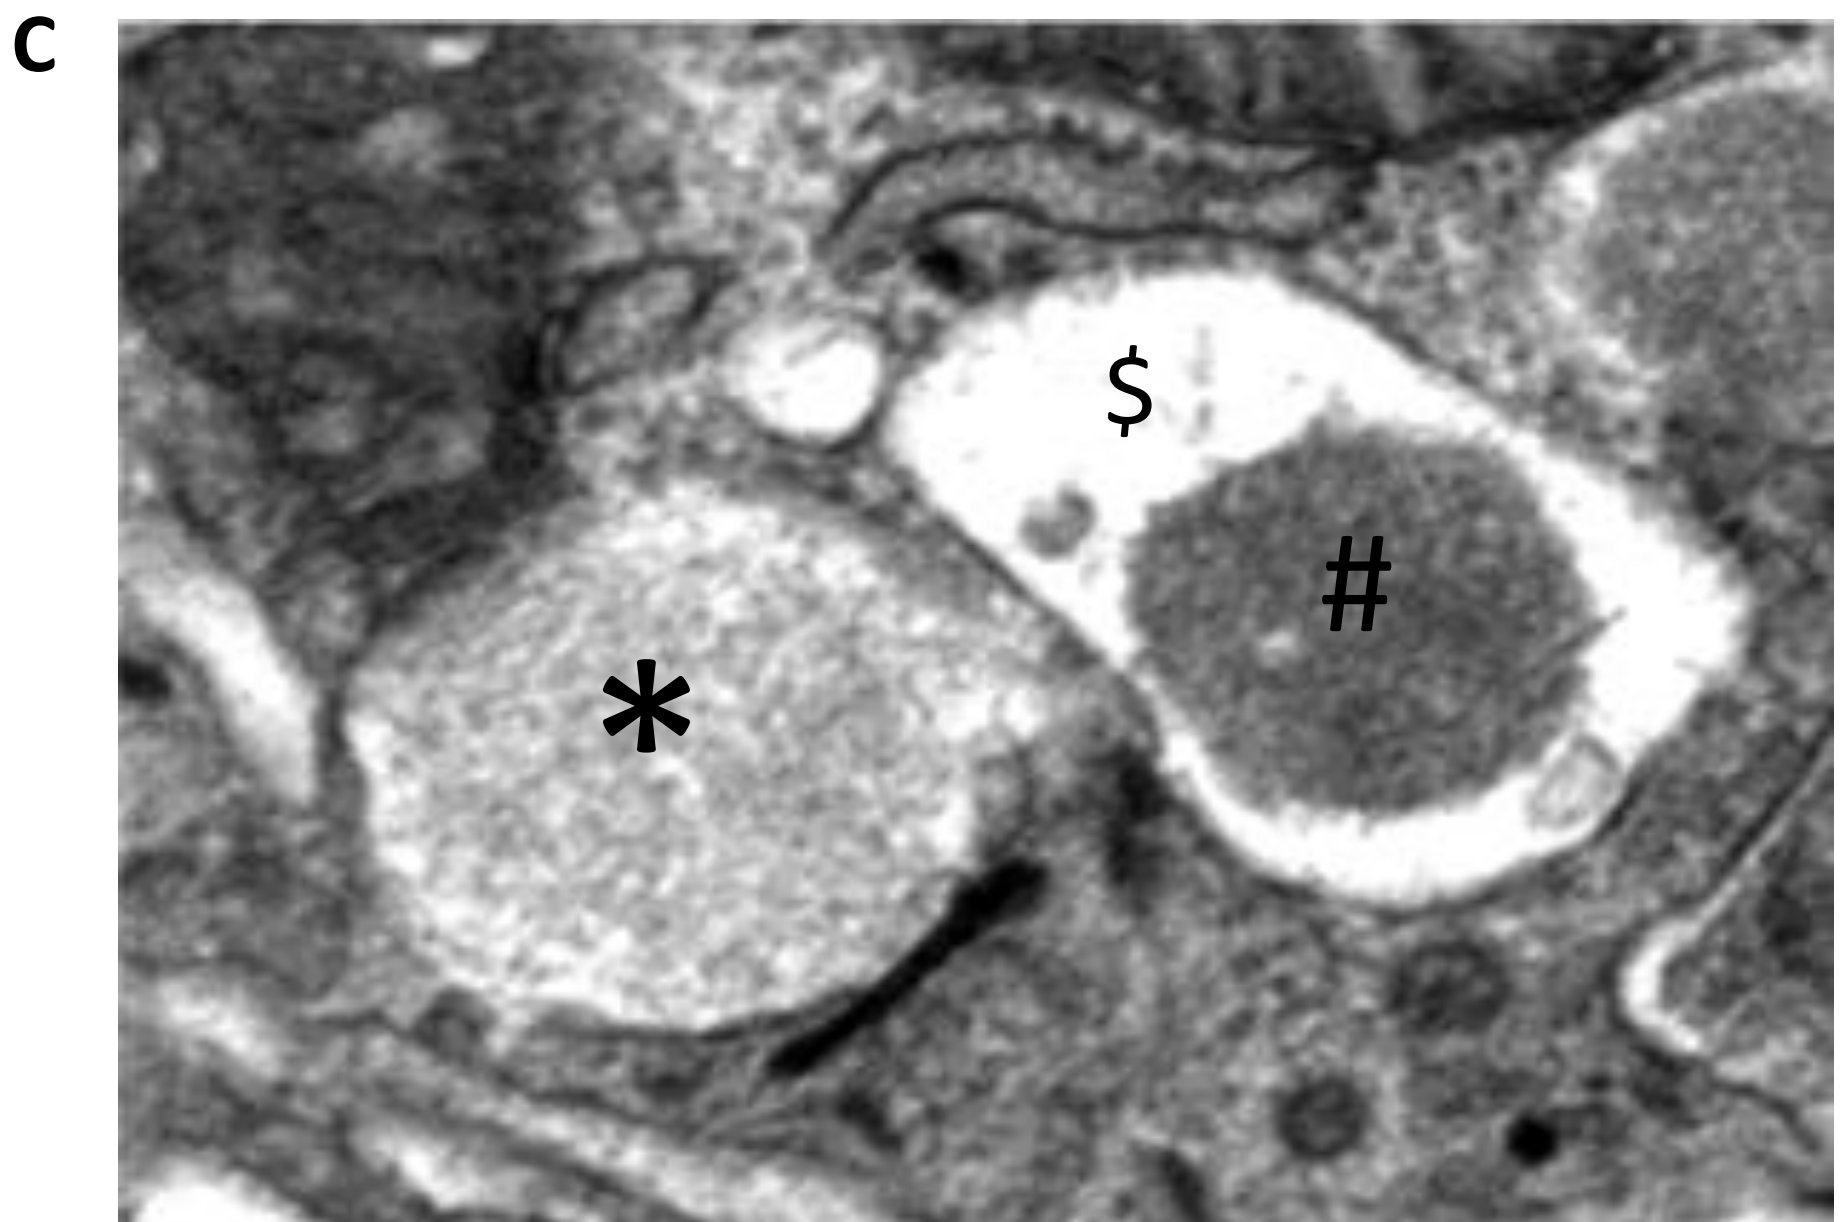

Supplementary Figure 6.

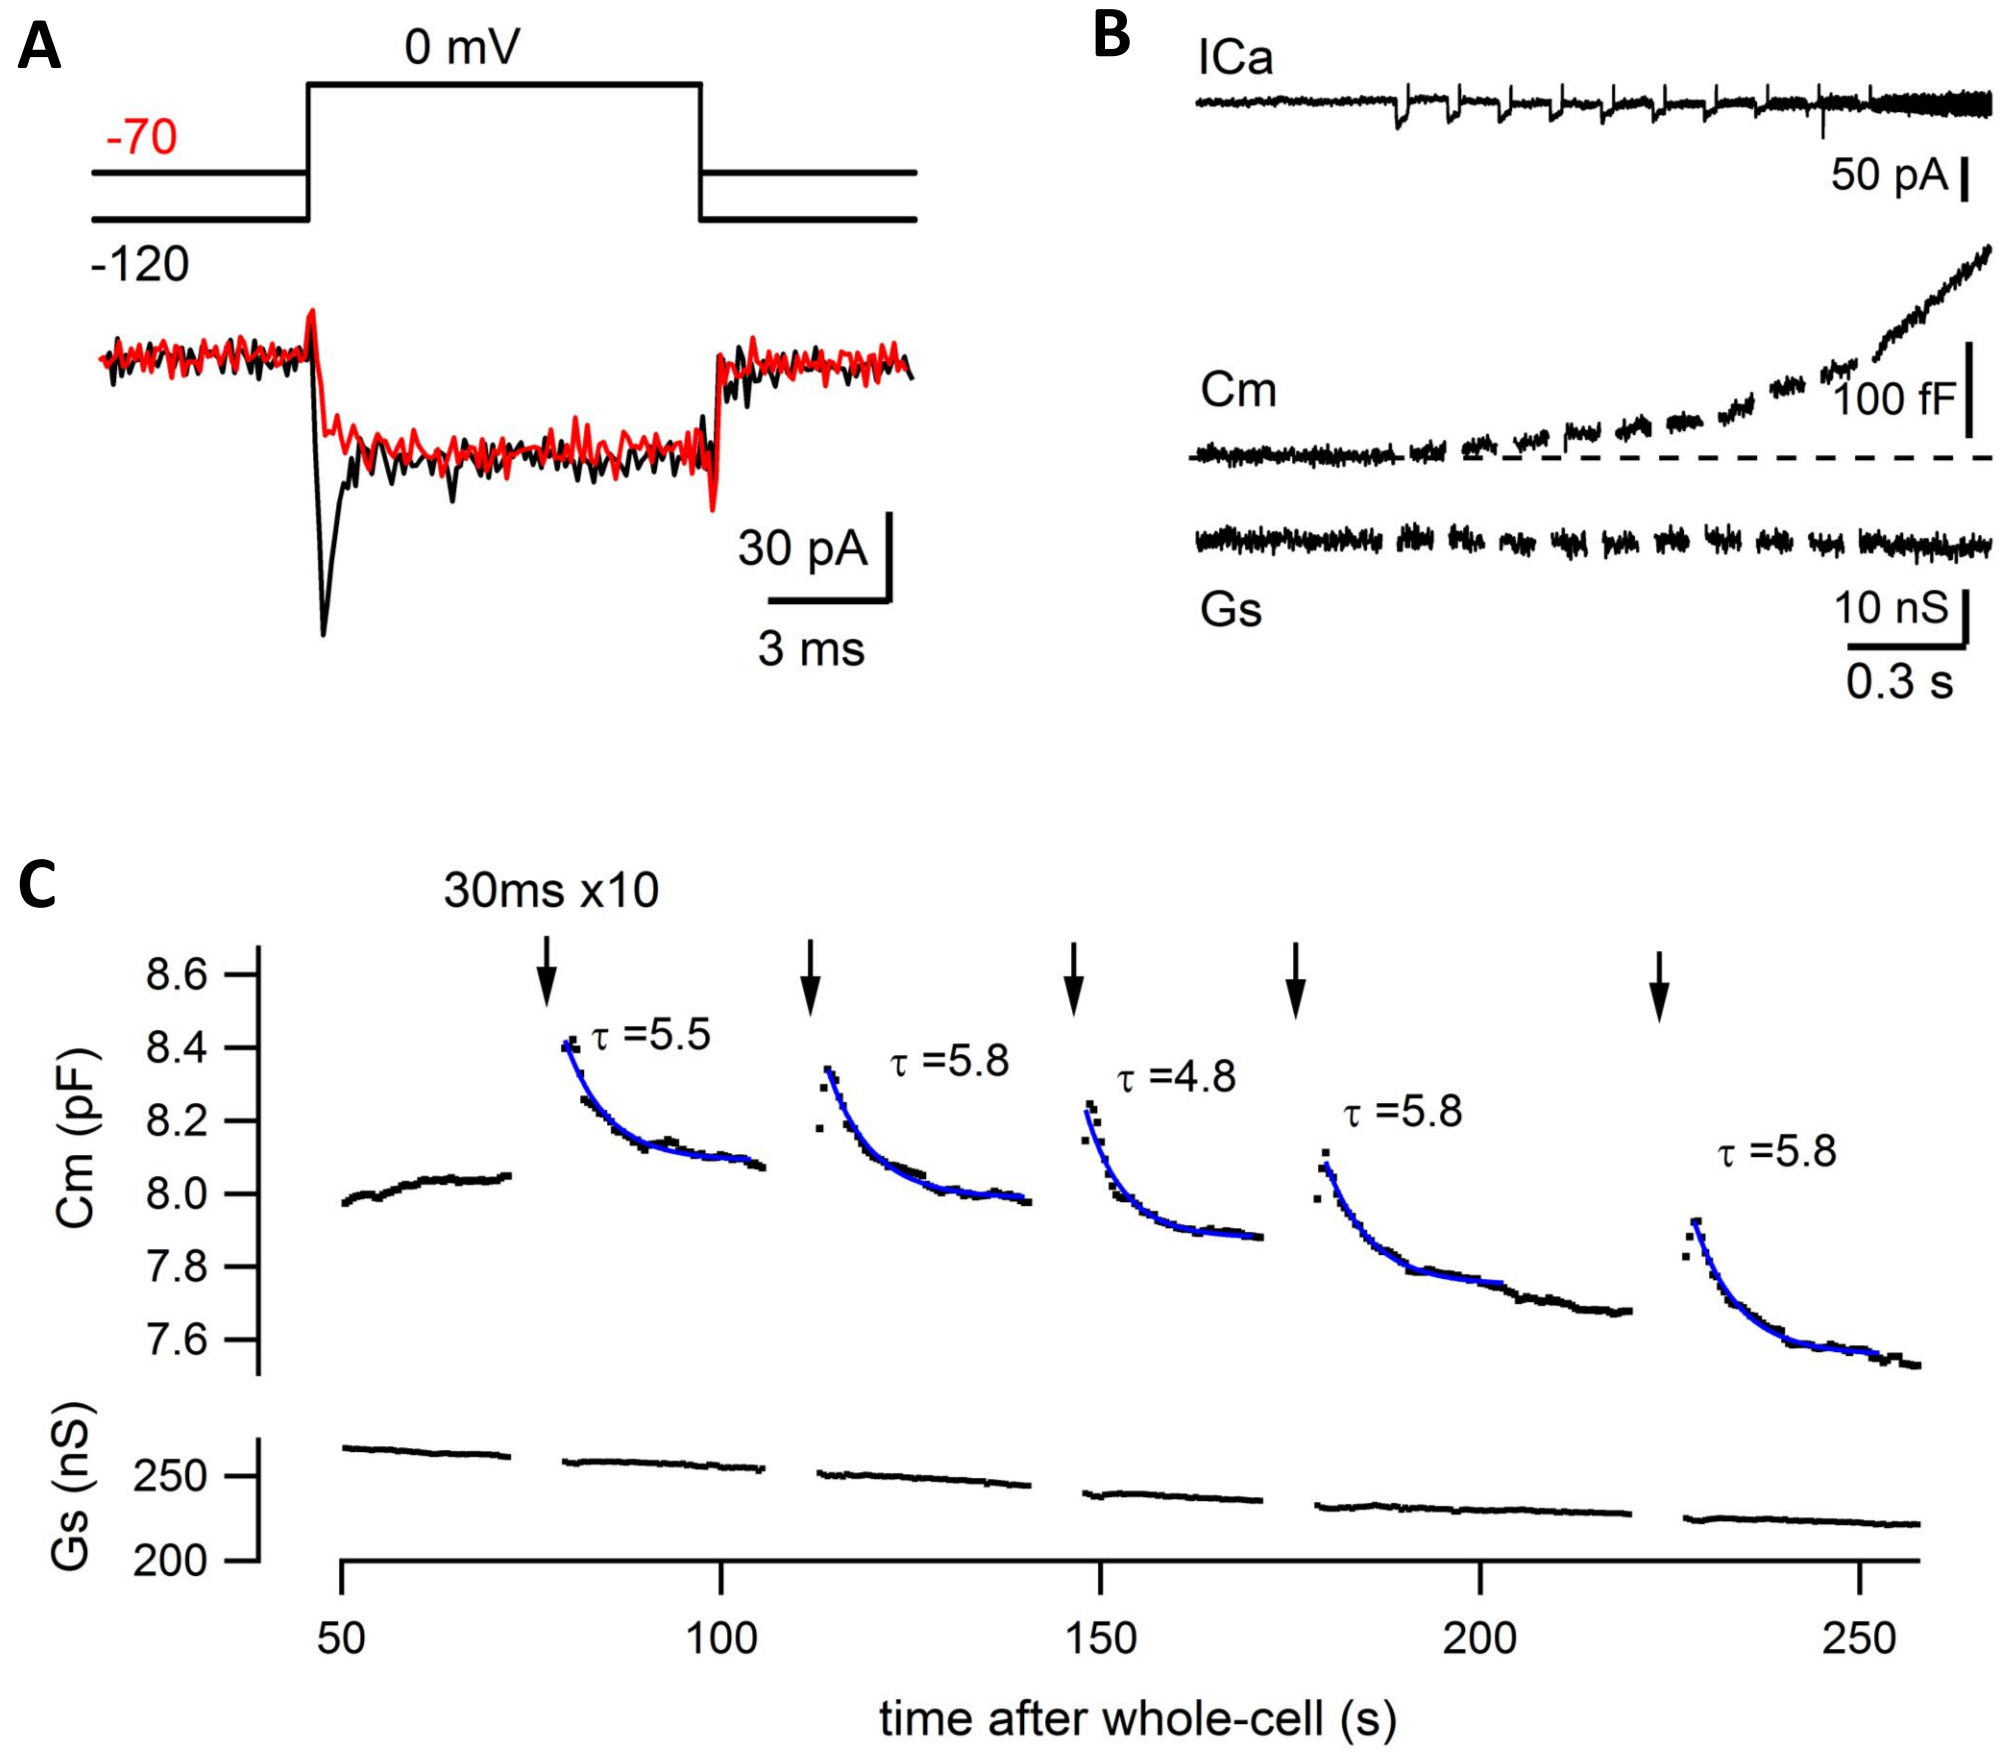

Supplementary Figure 7.

## Supplementary files for “Dynamin 2 regulates biphasic insulin secretion and plasma glucose homeostasis” by Fan *et al.*

1. Supplementary Material and methods;
2. Supplementary figure legends

### **SUPPLEMENTARY MATERIALS AND METHODS**

#### **Temporally Controlled And $\beta$ Cell Specific Gene Deletion In Mice**

Pancreatic  $\beta$  cell specific, tamoxifen inducible *Dnm2* KO mice were generated using a Cre-Lox directed gene knockout strategy. We crossed mice carrying floxed sites in the exon-2 of dynamin 2 gene (*Dnm2<sup>ff</sup>*) (48) with *Tg(Ins1-cre/ERT)1Lpi* (also termed *MIP1-CreERT*) transgenic mice(49). *Dnm2<sup>ff</sup>* mice were provided by Dr. Pietro De Camilli (Yale University). Mouse genotypes were determined by PCR (primers sequence for *Dnm2<sup>ff</sup>*: 5'-GCA GGA AGA CAC ACA ACT GAA C -3' and 5'-CCT GCT AGT GAC CTT TCT TGA G-3'; for *MIP1-CreERT*: 5'- CCTGGCGATCCCTGAACATGTCCT-3' and 5'-TGGACTATAAAGCTGGTGGGCAT -3'). *Dnm2<sup>ff</sup>MIP1-CreER* mice and the age-matched littermate controls (*Dnm2<sup>ff</sup>*) were paired for most experiments if possible, although black-6 mice were also occasionally used in some earlier experiments.

Mice were administrated at an age of 1-3 months with Tamoxifen (0.15 g/kg body weight dissolved in corn oil as vehicle, injected intraperitoneally, once a day) for 10 days, and experiments started ~4 weeks after the first tamoxifen treatment. 76-94.3% of  $\beta$  cells showed efficient dynamin 2 depletion in isolated  $\beta$  cell cultures, depending on the doses and protocols (data not shown). Dynamin 2 elimination efficiency in pancreatic  $\beta$  cells was confirmed by both western blotting and pancreatic islet immunofluorescence (Figure 2B-C). The remaining weak signals in *Dnm2* KO samples may arise from the dynamin 2 in non- $\beta$  cells in islets (i.e.,  $\alpha$  cells, Figure 2C) or incomplete dynamin 2 depletion in a small number of  $\beta$  cells. The *Dnm2* null mice appeared normal overall as compared to their littermate controls. Mice were housed in a temperature and humidity controlled room with standard light-dark cycle and free access to food (standard chow) and water if not specified.



## Glucose Tolerance Tests (GTTs) and Insulin Tolerance Tests (ITTs)

Mice were fasted (single mouse per cage with water supplied) overnight (for ~14 hours, 6:30pm-8:30am) in a quiet procedure room and injected with glucose (i.p., 2 g/kg body weight). Mouse blood was sampled from the tail vein at 0, 15, 30, 60, and 120 minutes after glucose injection. The plasma glucose levels were measured using a glucose meter (OneTouch-Ultra2, LifeScan Inc. or TRUEresult, Nipro Diagnostics, Inc.). For insulin tolerance tests, mice were fasted for ~6 h (9:00am–3:00pm) and intraperitoneally injected with Novolin R (0.75 units/kg body weight; Novo Nordisk Inc) before sampling tail blood. Age-matched littermates (*Dnm2<sup>fl/fl</sup>* MIP1-CreER and *Dnm2<sup>fl/fl</sup>* after injections of vehicle with and without tamoxifen) were used for GTTs as specified in the main text to minimize the variation in litter background, intrauterine environment, etc. For high fat diet experiments, mice were fed with the high fat diet (Research Diets Inc, D12331, 58 kcal% fat with sucrose) starting at an age of ~1 month for 3 months before experiments.

## Islet Perfusion and Insulin Secretion Assays

Islet perfusion was performed at 37 °C using a system designed in this laboratory. Islets were loaded into the micro-chamber (60 µl) and perfused with Krebs-Ringer bicarbonate buffer (KRBB) (in mM: 120 NaCl, 4.7 KCl, 2.5 CaCl<sub>2</sub>, 1.2 MgSO<sub>4</sub>, 25 NaHCO<sub>3</sub>, 1.2 KH<sub>2</sub>PO<sub>4</sub>, 10 HEPES, 2.8 D-Glucose, 0.1% BSA) using 1/32 ID polyethylene tubing (PE20). The flow rate was controlled by a perfusion pump at 310 µl/min, and the dead volume of the perfusion system was 600 µl total with a stimulation time delay of 95 s. Fractions were collected with a fraction collector using a 96-well plate at a flow rate of 310 µl/well/min. Equal number (30-50) and size of isolated islets were closely paired between control and KO mice in each experiment. Islets were first stabilized for at least 30 minutes with continuous perfusion of 2.8 mM glucose in KRBB at 37 °C before fraction collection. Following the establishment of a baseline with perfusion of 2.8 mM glucose (in KRBB) for 10 minutes, 20 mM glucose in KRBB was applied for 30 minutes followed by a return to 2.8 mM glucose for 10 minutes, 30 mM KCl (containing 2.8 mM glucose) was applied for 10 minutes. Insulin levels in fractions were measured using an insulin AlphaLISA assay (101) (#AL204C, 2 µl scale, PerkinElmer Inc., Waltham, MA) according to the manufacture instructions. Fraction samples were measured at different interval, with 1 minute per

sample during fast insulin dynamic time windows (Figure 3A-B). Samples were loaded in a 384-well testing plate (proxiPlate-384 white, #6008280, PerkinElmer Inc.) and scanned with an EnSpire plate reader (680 nm laser excitation and 615 nm emission, PerkinElmer Inc.), and insulin levels were calculated using standard curves (fitted with the Hill equation) obtained in each experiment. In area under curve (AUC) analysis, secretion between the time windows of 10-20 minutes and 20-40 minutes in Figure 3 were calculated as the first phase and second phase.

### **Patch-clamp and Cell Membrane Capacitance Measurements**

$\beta$  cells were perfused continuously in a heated chamber (RC-26GLP laminar flow chamber with PH-1 heating plate, Warner Instruments) under an IX-70 inverted microscope (Olympus), with temperature maintained at 34-36 °C by a temperature controller (TC344-B, Warner Instruments). Whole-cell voltage patch-clamp recordings were performed as previously described (60) using an EPC10-2 amplifier and Patch-master software (HEKA Elektronik, Germany). The pipette resistance was about 3-5 M $\Omega$  and access resistance ( $R_s$ ) compensation was > 80% during recordings with a holding potential ( $V_h$ ) of -70 mV.  $\beta$  cells were identified with fully inactivated sodium channels(60) at  $V_h$  of -70 but not -120 mV (supplementary Figure 7A).  $C_m$  measurements were carried out with the Sine-DC technique via the lock-in extension of Patch-master as described previously (40). The amplitude of exocytosis ( $C_m$  jump) was measured as the difference in  $C_m$  before and after depolarization. Endocytosis was quantified as the  $C_m$  decrease at 2 s and 10 s after stimulation. Endocytosis during the train of pulses was analyzed as described previously (40). The extracellular solution contained (in mM): 118 NaCl, 20 TEA-Cl, 5.6 KCl, 1.2 MgCl<sub>2</sub>, 2.6 CaCl<sub>2</sub>, 10 HEPES, and 5 D-glucose (pH 7.4, ~298 mOsm). The intracellular/pipette solution consisted of (in mM) 118 Cs-glutamate, 20 TEA-Cl, 10 NaCl, 1 MgCl<sub>2</sub>, 0.05 CsEGTA, 3 Mg-ATP, 0.35 GTP, 0.1 cyclic-AMP, and 10 HEPES (pH 7.2 with CsOH, ~295 mOsm). Data were analyzed with Igor Pro (Wavemetrics).

### **Western Blotting**

Pancreatic islets were homogenized in lysis buffer (1% SDS + 1 mM EDTA + 25 mM Tris + 15 mM NaCl), loaded on 12-15% gradient SDS-PAGE (~120 islets per well), and

proteins separated by electrophoresis were transferred to a nitrocellulose membrane and immuno-blotted with the specified primary antibodies: Actin (Millipore, 69100, mouse 1:500), Tubulin (Santa Cruz, SC8035, mouse, 1:1000), GAPDH (Thermo Fisher Scientific, MA5-15738, 1:5000), Syntaxin1 (Santa Cruz, 1:1000) and dynamin antibodies (see below). HRP conjugated secondary antibodies were used for chemiluminescent imaging.

### **Immunofluorescence Staining**

Pancreata were fixed with 4% paraformaldehyde (PFA) + 4% sucrose in 0.12 M sodium phosphate buffer, embedded in OCT and cut in 8  $\mu$ M frozen sections. Tissue sections were permeabilized and blocked with 0.4% TritonX-100+ 3 % bovine serum albumin+ 2 % goat serum for 1 hour. Heat retrieval was applied before permeabilization if required. Specimens were incubated with primary antibodies for 2 hours followed by thorough washing. Fluorescence conjugated secondary antibodies were applied for 50 minutes to visualize staining, counterstained with DAPI (sigma, D8417) if necessary, and mounted on glass slides with Fluoromount-G (Southern Biotech, 0100-01). Cells grown on the coverslips were fixed in 2% PFA for 20 minutes, and similarly treated as tissue sections. Primary antibodies used in this study: Insulin (Abcam ab7842, guinea pig, 1:100), Glucagon (Abcam, ab10988, mouse, 1:100), Clathrin light chain (Millipore, AB9884, IF 1:500, WB 1:2000), Dynamin 1 (Epitomics, 1851-1, IF 1:100, WB 1:2000), Dynamin 2 (rabbit polyclonal from PDC lab, IF 1:100, WB 1:500 (39); or Santa Cruz, sc-6400, (C-18), goat polyclonal IgG, IF 1:100, WB 1:500, cross-react with dynamin 3), Dynamin 3 (mouse monoclonal from PDC lab, IF1:100, WB 1:1000) (41), pan-dynamin (BD 610246, IF 1:100, WB 1:2000), proinsulin (GS-9A8, monoclonal IgG1, DSHB, University of Iowa, Iowa city). Alexa Fluor® 488 Phalloidin (A12379, 300 unite), Alexa Fluor® 647 Phalloidin (A 22287, 300 unite). All the secondary antibodies conjugated with different Alexa Fluorophores were from LifeTechnology.

### **Spinning Disk Confocal and TIRF imaging**

Fluorescence imaging was performed with a Nikon Ti-E Eclipse inverted microscope based imaging system under the control of NIS-Elements software. It was equipped with Ti-ND6-PFS Perfect Focus, motorized nosepiece with multiple objectives

(CFI Plan Fluor 4X, NA 0.13 WD, 17.2 mm; CFI Plan APO Lambda 20X, NA 0.75, WD 1.00 mm; Plan APO VC 60X Oil, NA 1.4, WD 0.13 mm and APO 100X Oil, NA 1.49, WD 0.12mm), a spinning disk (CSU X-1, 10,000 rpm, Yokogawa), Ti-TIRF Motorized Illuminator Unit, Agilent MLC400 High Power Monolithic Laser Combiner SP with 405, 488, 561 and 642 nm lasers, EMCCD (iXon X3 DU897, Andor) and Neo-sCMOS cameras (Andor) at the left and the right imaging port of the microscope respectively, 10-position filter wheels (Sutter), and Lumen 200 Illumination System. Spinning disk confocal imaging was performed using the left imaging port and TIRF images were taken using the right imaging port through the 100x objective (NA=1.49) under the critical illumination angle. For 3-D cell imaging, 200~300 nm optical section images were acquired between the top and the bottom of cells. The z-projections were shown for pro-insulin. Imaging 3-D reconstruction, fluorescence analysis, and quantification were done using NIS-Elements (Nikon). Images in each figure were displayed using the same contrast/ brightness scale for both control and *Dnm2* KO cells unless specified.

TIRF images were acquired using the same configurations for paired control and KO experiments. The insulin granules that were visualized under a narrow TIRF illumination angle were define as docked granules. This may slightly over estimate docked granules since TIRFM penetration depth is ~100 nm (or less), but this should not affect our conclusion since both control and KO were treated in the same way. The granule number were analyzed using the spot detection function of NIS elements with the same parameter settings. For Figure 8F, cells were preincubated with 10 nM GLP-1 for 30 minutes, then stimulated with 20 mM glucose and 10 nM GLP-1 for 1 hour at 37 °C and fixed immediately, followed with insulin antibody immunostaining for TIRF imaging. For F-actin rescue experiments,  $\beta$  cell cultures were transfected with dynamin 2 RFP (From Pietro De Camilli) using Lipofectamine® 2000. Cells were fixed and stained with phalloidin and anti-insulin antibody after 3 days of expression. Insulin positive cells with and without RFP were imaged under TIRFM using the same settings.

### **Live-cell TIRF Imaging of Insulin Granule Fusion In Individual $\beta$ Cells**

We first generated NPY-pHluorin as a new probe by replacing EGFP in NPY-EGFP plasmid with the pH sensitive pHluorin (Both NPY-EGFP and pHluorin were from Pietro De

Camili). NPY-pHluorin has the advantage of higher signal/noise ratio for fusion events due to its pH sensitivity, and it is more sensitive to granule fusion events than NPY-EGFP. It was sometimes hard to distinguish granule release from granule undocking or granule visiting to the PM when the fluorescence spots disappeared without typical fluorescence “flashes” when using EGFP. NPY-pHluorin has advantage to avoid this complication since it showed fluorescence only upon granule fusion, but a trade-off is that it provides no information on granule dynamics before granule fusion due to its invisibility in the cells.

$\beta$  cells grown on coverslips were transfected with NPY-pHluorin with Lipofectamine® 2000 (LifeTechnology), live-cell imaging of insulin secretion were performed within 40 hours after transfection to have reproducible measure of fusion events. After that time, fusion events induced by 20 mM glucose often rapidly declined somehow. Cells were loaded in a temperature controlled chamber placed in a heating device (QE-1, Warner Instrument) under the continuous perfusion of KRBB or 20 mM glucose in KRBB (pH=7.3), the temperature at the center of the cover glass (#1.5, Warner Instrument) was maintained at 35-37 °C by a two-channel temperature controller (TC344B, Warner Instrument). Cells were excited by a 488 nm laser and emission fluorescence light was collected through a BP525/50 filter by the Neo-sCMOS cameras (Andor). TIRFM Images were continuously acquired at 5 Hz (200 ms exposure) with 2x2 pixel binning unless specified. The fusion events can be unambiguously identified using the new fluorescence probe which has a large signal/noise ratio (as shown in Figure 3F), and fusion events were counted and marked manually. All the events detected between 0-6 minutes and 7-20 minutes during 20 mM glucose perfusion were defined as 1<sup>st</sup> and 2<sup>nd</sup> phase, respectively. Vesicle fusion events were normalized to the individual areas of the cell footprint imaged.

### **Transferrin Uptake Assay**

Cultured  $\beta$  cells were incubated with Alexa Fluor 567 conjugated-transferrin (Transferrin-AF567, 25  $\mu$ g/ml, Invitrogen,T23365) in normal culture medium for 10 minutes (37 °C) after pre-incubation in serum-free DMEM for an hour, then washed with acidic buffer, and fixed with 2% PFA. Cells were further immunostained with insulin antibody to identify  $\beta$  cells. Transferrin fluorescent signal was imaged at the middle and bottom of individual cells with spinning disk confocal microscopy (561 nm laser excitation, 100X, NA

1.49, BP605/70 nm filter). Averaged fluorescence intensity of insulin-positive cells was measured in NIS-Elements. Normally, data were analyzed from 6-12 cells in each control and KO group in an individual experiment for a total of 3-5 independent experiments.

### **Cytosolic Ca<sup>2+</sup> Imaging and NADPH imaging**

Intracellular Ca<sup>2+</sup> ([Ca<sup>2+</sup>]<sub>i</sub>) was measured by fura-2 ratiometric fluorescence imaging as described previously (42). Purified pancreatic islets were loaded with 5 μM Fura-2-acetoxymethyl ester (TEFLabs, Austin) at 37 °C for 30 minutes in an incubator. Islets were washed 2 times and placed into a heated imaging chamber (RC-26G laminar flow chamber with PH-1 heating plate, Warner Instruments) under the Olympus upright microscope (BX-51), islets were continuously perfused with 2.8 mM Glucose KRBB solution with temperature maintained at 34 °C with a temperature controller (TC344-B, Warner Instruments). 12.8 mM glucose and 30 mM KCl were applied through the perfusion solution. The islets were excited with 350 and 380 nm light sequentially from monochromator (TILL-Photonics) and fluorescent signals passed through a water immersion lens (20X, 1.0 NA) and a LP-440 filter and collected with an EMCCD camera (iXon DU885, Andor, 4x4 binning, 5 ms exposure time) at 0.5 Hz. Fluorescence from individual islets was collected, and [Ca<sup>2+</sup>]<sub>i</sub> was calculated from background corrected fluorescence ratios using in vitro calibration procedures as described previously (102).

NADPH fluorescence imaging was carried out with the same system as the Ca<sup>2+</sup> imaging. Islets were perfused with KRBB containing 2.8 mM and 20 mM glucose at 34 °C and excited at 372 nm at which NADPH reached its maximum in our fluorescence scanning system (Figure 2G), and images were acquired at 0.5 Hz through an ET525/50 filter (Chroma). Fluorescence signals from each islet were presented as average fluorescence intensity after background subtraction.

### **Electron Microscopy (EM) and EM Tomography**

Electron microscopy was carried out as describe previously(40), with minor modification. Pancreatic islets (cultured overnight in normal medium) were rinsed with PBS, immersion fixed with 2.5% glutaraldehyde in 0.1 M sodium cacodylate buffer for 2 hours, washed with PBS and post-fixed in 1% OsO<sub>4</sub>, 1.5% K<sub>4</sub>Fe(CN)<sub>6</sub>, 0.1M sodium cacodylate for

1 hour. Islets were *en bloc* stained in 0.5% uranyl magnesium acetate for 1 hour after multiple rinses with PBS (all above steps were at room temperature), dehydrated and embedded in PolyBed 812. Ultrathin sections (70-90 nm) were cut and placed on Pioloform coated 2x1 copper slot grids, post-stained with uranyl acetate and Sato's lead citrate for further contrast. In order to preserve the fine structures of cellular membranes, *En bloc* staining and post uranyl acetate staining were skipped in some experiments, and the typical insulin granule dense cores were not obvious in these samples. Islets sections were viewed under a Philips CM120 (or CM10) electron microscope at 80 KV and images were captured with an SIS MegaView III (or Morada, 2k x 2k) CCD camera (Olympus, Lakewood, CO). For glucose stimulation, islets were incubated with 20 mM glucose in KRBB for 20 minutes at 37 °C in an incubator before fixation. Electron microscopy reagents were purchased from Electron Microscopy Sciences (Hatfield, PA).

EM images were quantified in iTEM software (Olympus). Different cell types in islets were identified according to their abundance and typical granule appearance:  $\beta$  cells contained numerous granules with electronic dense cores surrounded by white space;  $\alpha$  cells often contained prominent long rough ER and fewer granules; their secretory granules were spherical, smaller in size, and contained extremely electron dense cores (data not shown). Insulin granule density was calculated by the total number of dense core granules in each cell divided by the cell area in the same section (nucleus excluded); Immature granules were identified by the following criteria: 1) homogeneous, lighter electron density granules with tight fitting membrane; 2) lack of the characteristic *halo* of the dense core granule. Docked granules were defined as the granules directly attached to the plasma membrane in EM sections (Figure 5). Obviously, this is a lower estimate for docked granule number in both control and KO  $\beta$  cells since the chance cutting tissue section exactly at the contact site between a spherical granule and the PM is low. For the spatial distribution of insulin granules, the shortest distance between each granule membrane and the PM was measured within 2.5  $\mu\text{m}$  from the PM in each EM section.

For electron tomography, tissue sections (200-250 nm) were imaged in a TECNAI TF20 transmission electron microscope (FEI, The Netherlands) operated at 200 kV (Yale Center for Cellular and Molecular Imaging, Yale University) as described previously(43). The

dual tilt series data from each section were collected every 2° over a ± 60° range using a FEI Eagle 4K × 4K CCD camera, and data from up to 3 consecutive sections were combined. Subcellular structures within three dimensions were segmented, aligned and modeled with IMOD Etomo software. For the generation of the final models, contours of membranes were traced using IMOD software manually.

## **Statistics**

All values were presented as mean ± SEM unless otherwise indicated. Statistic comparisons for two samples were performed with two-tailed Student's *t* test, and one-way analysis of Variance (ANOVA) with the post-hoc Tukey Honest Significant Differences (HSD) Tests were used to compare three or more samples.  $p < 0.05$  was taken as a statistically significant difference, as denoted with asterisks (\*  $p < 0.05$ , \*\*  $p < 0.01$ , \*\*\*  $p < 0.005$ ).

## **Study approval**

All protocols involving animals in this study were approved by the Institutional Animal Care and Use Committee of the University of Wisconsin-Madison and followed the NIH Guide for the Care and Use of Laboratory Animals.



## **SUPPLEMENTARY FIGURE LEGENDS:**

### **Suppl. Figure 1. Dynamin 1 is undetectable in mouse islet lysate and isolated $\beta$ cells.**

(A) Western blots with rabbit polyclonal anti-dynamin 1 antibody (Cat#1851, Epitomics) with longer exposure (6 minutes, the same blots as Figure 1a). (B) Western blots with mouse monoclonal anti-dynamin 1 antibody (Clone 5, PDC lab), also with long exposure time. Note the dynamin 1 was detected in fibroblasts but not islets. (C) Immunofluorescence of different dynamin isoforms in isolated  $\beta$  cell cultures. Note the different dynamin isoform signals in individual insulin positive cells. Arrows indicate non- $\beta$  cells in the cultures.

### **Suppl. Figure 2. Subcellular distribution of dynamin 2 in $\beta$ cells.**

(A-B) A primary pancreatic  $\beta$  cell was imaged in the bottom (A) and middle (B) optical sections using spinning disk confocal microscopy. Note the punctate appearance of endogenous dynamin 2 at the PM vs the relatively diffuse signal in the cytosol. (C) Cross section views of dynamin 2 distribution in a 3-D reconstructed  $\beta$  cell (300 nm for each optical section). This was the same cell shown in Figure 1g but imaged at three-dimension. Scale bar 5  $\mu$ m.

### **Suppl. Figure 3. Pancreatic islet cellular structure re-organization in Dnm2 KO mice**

(A)  $\alpha$  cells mainly located in the periphery of islets in control mice. (B) In dnm2 KO mice,  $\alpha$  cells also appeared in the center of islets as indicated by arrows, and they were intermixed with  $\beta$  cells. Scale Bar: 20  $\mu$ m.

### **Suppl. Figure 4. Selective dynamin 2 deletion in $\beta$ cells in pancreatic islets from conditional Dnm2 KO mice.**

(A) Triple-color immunofluorescence images of the part of a control pancreatic islet. Insulin, glucagon, and dynamin 2 were in red, green and blue; 100x objective. (B) the same as A but from a KO mice. Note dynamin fluorescence largely disappeared in insulin positive area but not from glucagon positive cells (circle). Insert Showed a enlarge view of a small area where dynamin 2 signal was not overlapped with insulin-positive cells. Scale bars: 10  $\mu$ m.

### **Suppl. Figure 5. Ultra-structure changes of Dnm2 KO $\beta$ cells.**

(A-B) Low magnification EM images of  $\beta$  cells from control (A) and Dnm2 KO mice (B). The  $\beta$  cell in the center of the image is labeled with pseudo color; inserts show the enlarged views of boxed regions. Note the larger, immature granules (see Methods for identification of immature granules) in the

Dnm2 KO  $\beta$  cell (arrows). (C) Spatial distribution of granules in  $\beta$  cells (n=15 cells for control; n=10 for dyn2 KO). (D) Increased accumulation of endocytic intermediates after 20 mM glucose stimulation for 20 minutes in dyn2 KO cells, the enlarged views of a few membrane invaginations (arrows) were shown on the right. (E) A gallery of endocytic intermediates in Dnm2 KO cells. Scale bars: 5  $\mu$ m in (A-B), 1  $\mu$ m in (d1). 50 nm in (d2)

**Suppl. Figure 6. Distinct characteristic structures between immature granules and mature granules in mouse pancreatic  $\beta$  cells revealed by electron microscopy.** (A) Schematic illustration of different appearance of typical immature granules and mature granules at different ultrathin section levels. (B) The EM image captured at the Glogi area of a  $\beta$  cell in dynamin 2 KO islets, where the immature granules and mature granules were present, granules with different maturation statuses were also visible. G=Golgi, M=Mitochondrial, MG=Mature granule, IG=Immature granule. (C) the enlarged view of the boxed region in (B). An immature granule (left) was next to the mature one (right). Note that the immature granule was filled with lighter electron density which is distinguishable from those in dense core or the surrounding halo region of the mature granule, as illustrated in (A).

**Suppl. Figure 7. Robust endocytosis in mouse pancreatic  $\beta$  cells under whole-cell patch-clamp** (A) Typical sodium channel inactivation at different membrane holding potentials in a  $\beta$  cell. Note the sizeable sodium current at -120 mV but not at -70 mV (red trace). (B)  $\text{Ca}^{2+}$  current,  $C_m$ , and  $G_s$  changes elicited by a short train of depolarizing pulses (30 ms x 10, 0 mV) shown at high time resolution. (C) Robust and reproducible endocytosis triggered repeatedly by the train of pulses (arrows) as shown in (B). Note that  $C_m$  decays follow a single exponential function with similar time constants (~5 s), with little change in  $G_s$  trace.
